# Supplementary material for: Clinical Impact of Immune Cells and Their Spatial Interactions in Diffuse Large B-Cell Lymphoma Microenvironment
Source: PubMed Central journal article supplement — Clin Cancer Res. 2021 Dec 13;28(4):781–92. doi: 10.1158/1078-0432.CCR-21-3140 (PMC9377736; doi:10.1158/1078-0432.ccr-21-3140), 2021-12-13

**Supplementary Fig. S4: The clinical impact of macrophages, NK cells and T cells in the DLBCL LME analyzed by mIHC**

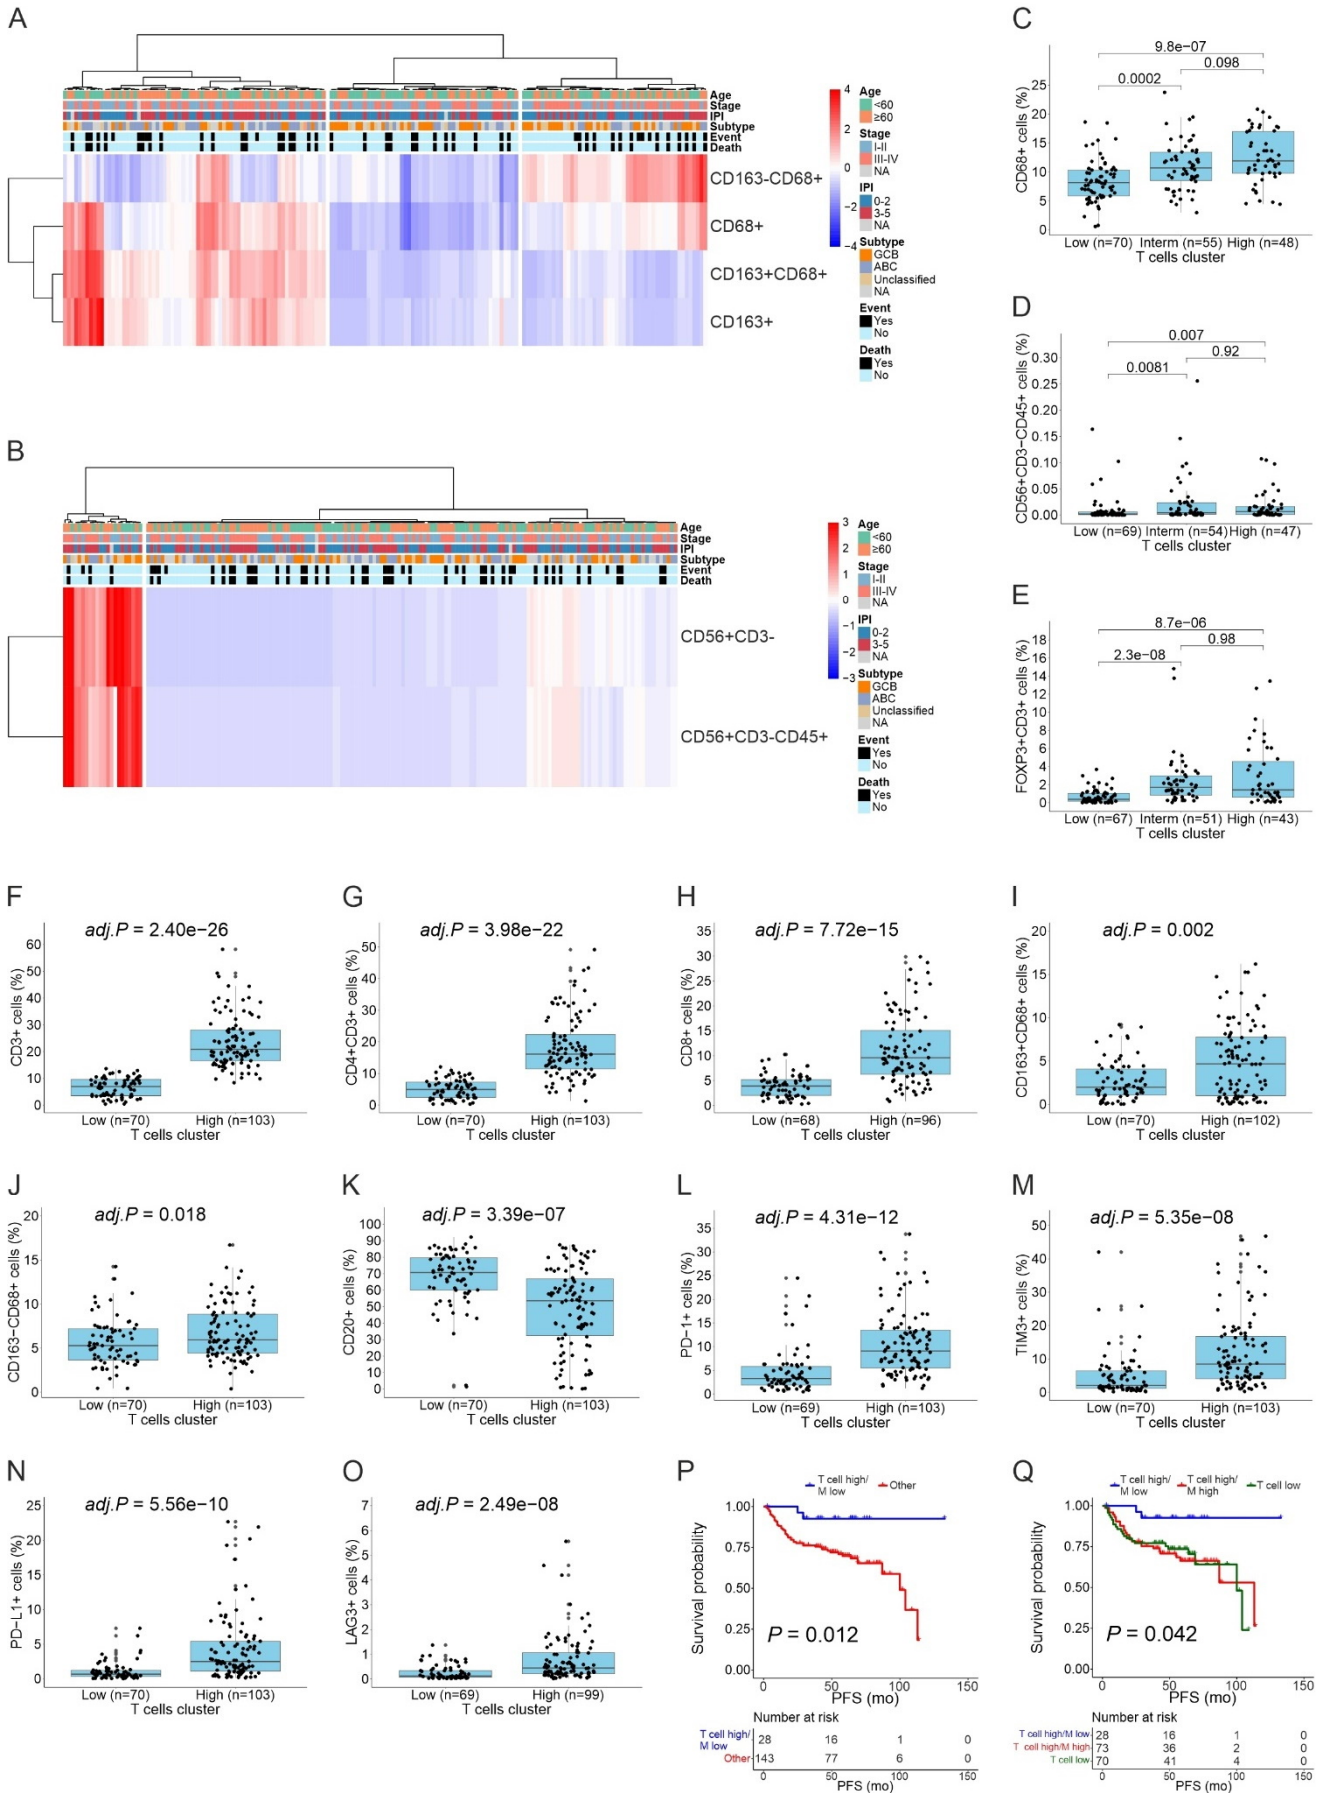

Supplementary Fig. S4: The clinical impact of macrophages, NK cells and T cells in the DLBCL LME analyzed by mIHC. A) Unsupervised hierarchical clustering of samples based on the proportion of macrophages. B) Unsupervised hierarchical clustering of samples based on the proportion of NK cells. C-E) Boxplots depicting the proportions of macrophages (C), NK cells (D), and regulatory T cells (E), in the groups with high, intermediate, and low proportions of T cells. F-O) Boxplots depicting the proportions of T cells (F), CD4+ T cells (G), CD8+ T cells (H), CD163+ macrophages (I), CD163- macrophages (J), B cells (K), PD-1+ cells (L), TIM3+ cells (M), PD-L1+ cells (N), and LAG3+ cells (O) in the groups with high and low proportion of T cells. P-Q) Kaplan-Meier (log-rank test) survival plot depicts PFS in the T cell high/macrophage low (T cell high/M low) and T cell high/macrophage high or T cell low groups (P), as well as in the T cell high/macrophage low (T cell high/M low), T cell high/macrophage high (T cell high/M high), and the T cell low groups (Q).

**Supplementary Fig. S6: The clinical impact of macrophages in the T cell high and low groups in non-double hit DLBCL patients in the mIHC cohort**

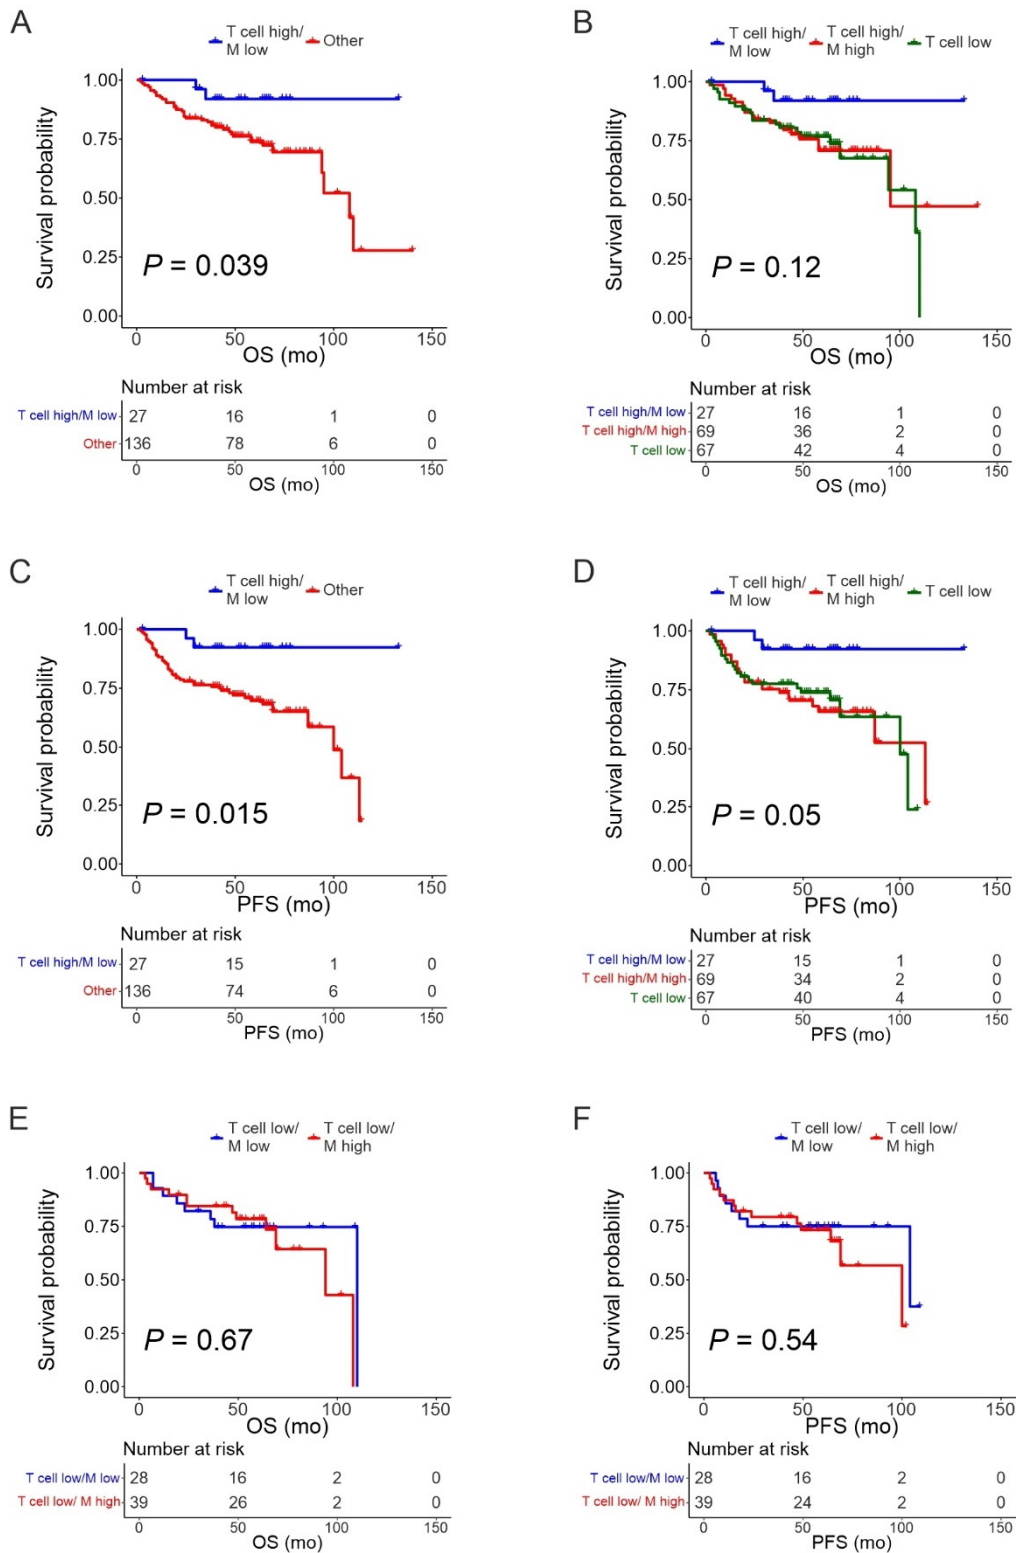

**Supplementary Fig. S7: The clinical impact of the macrophage/T cell proportion in the mIHC cohort**

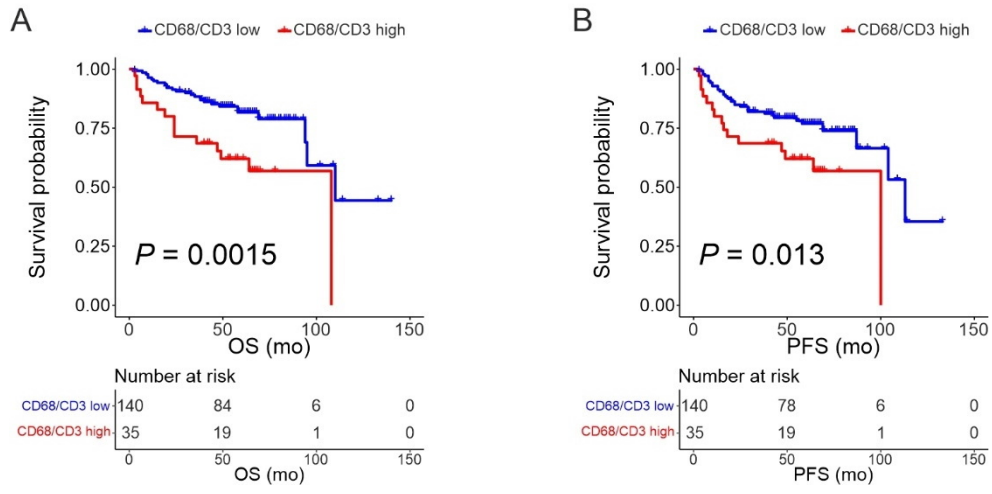

**Supplementary Fig. S8: CIBERSORT deconvolution analysis in the Reddy et al. validation cohort**

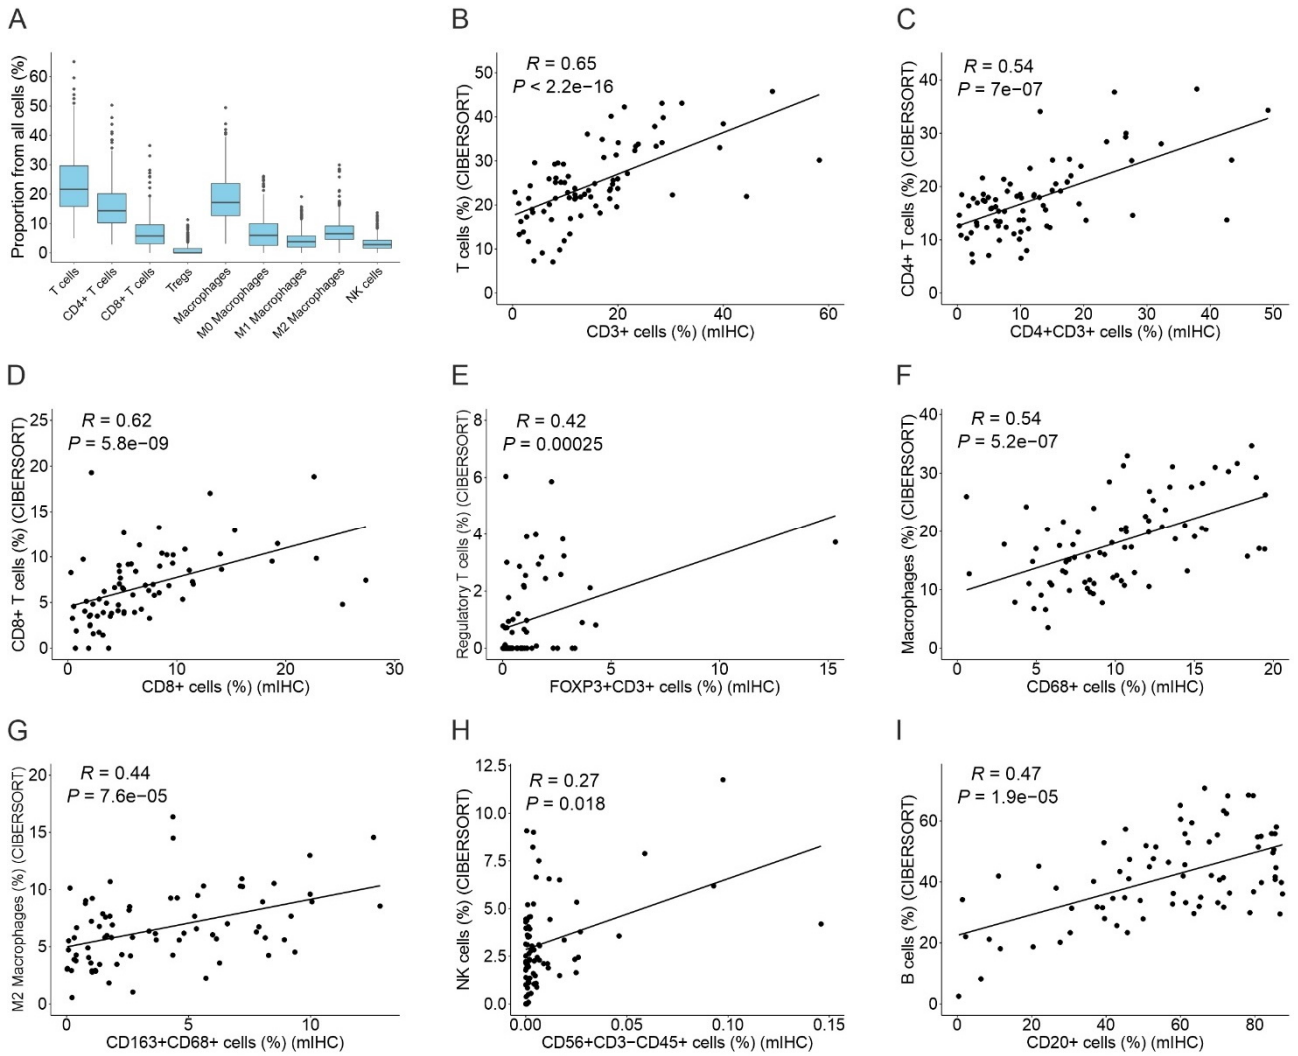

**Supplementary Fig. S9: The clinical impact of macrophages, NK cells and T cells in the LME analyzed by CIBERSORT in the Reddy et al. validation cohort**

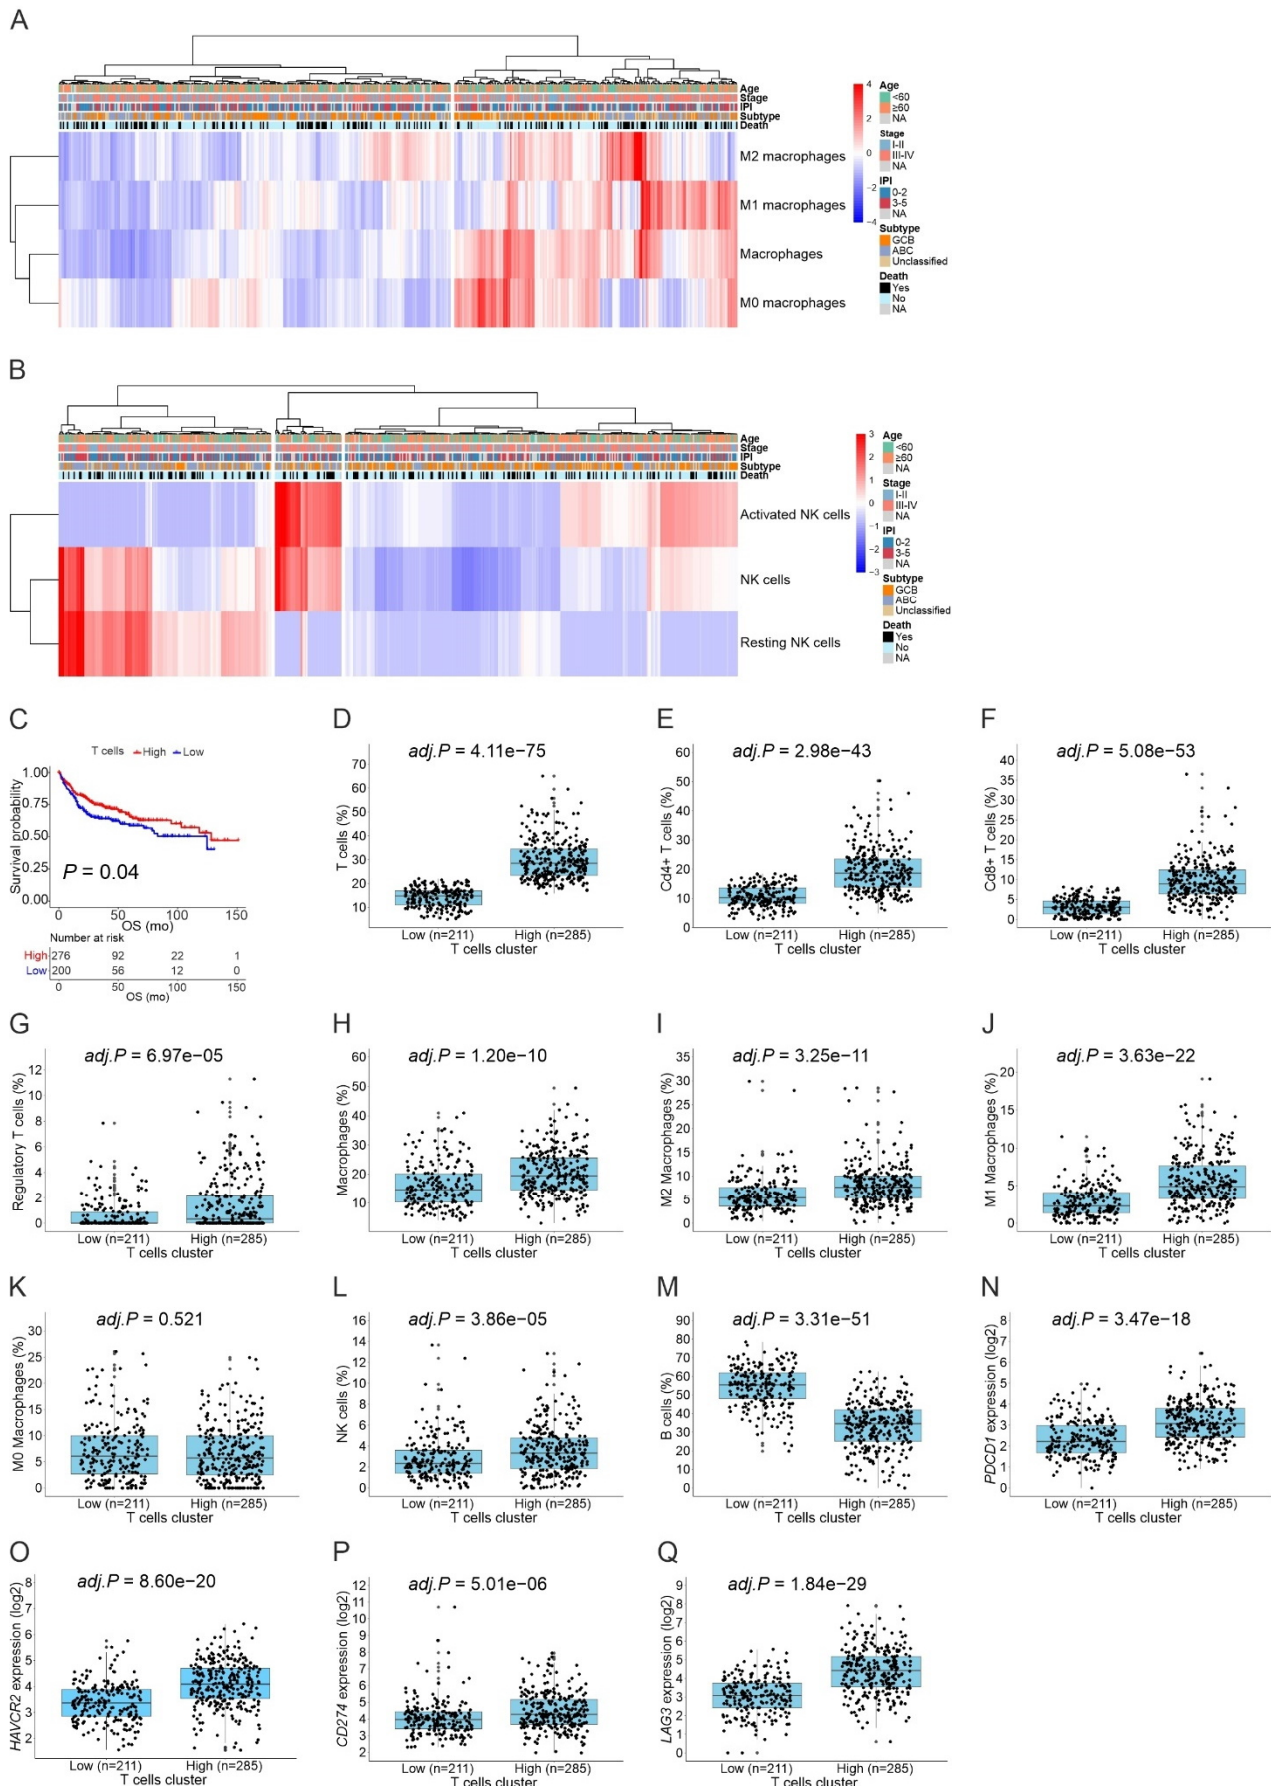

**Supplementary Fig. S10: Differential expression of genes and pathways between distinct LME phenotypes**

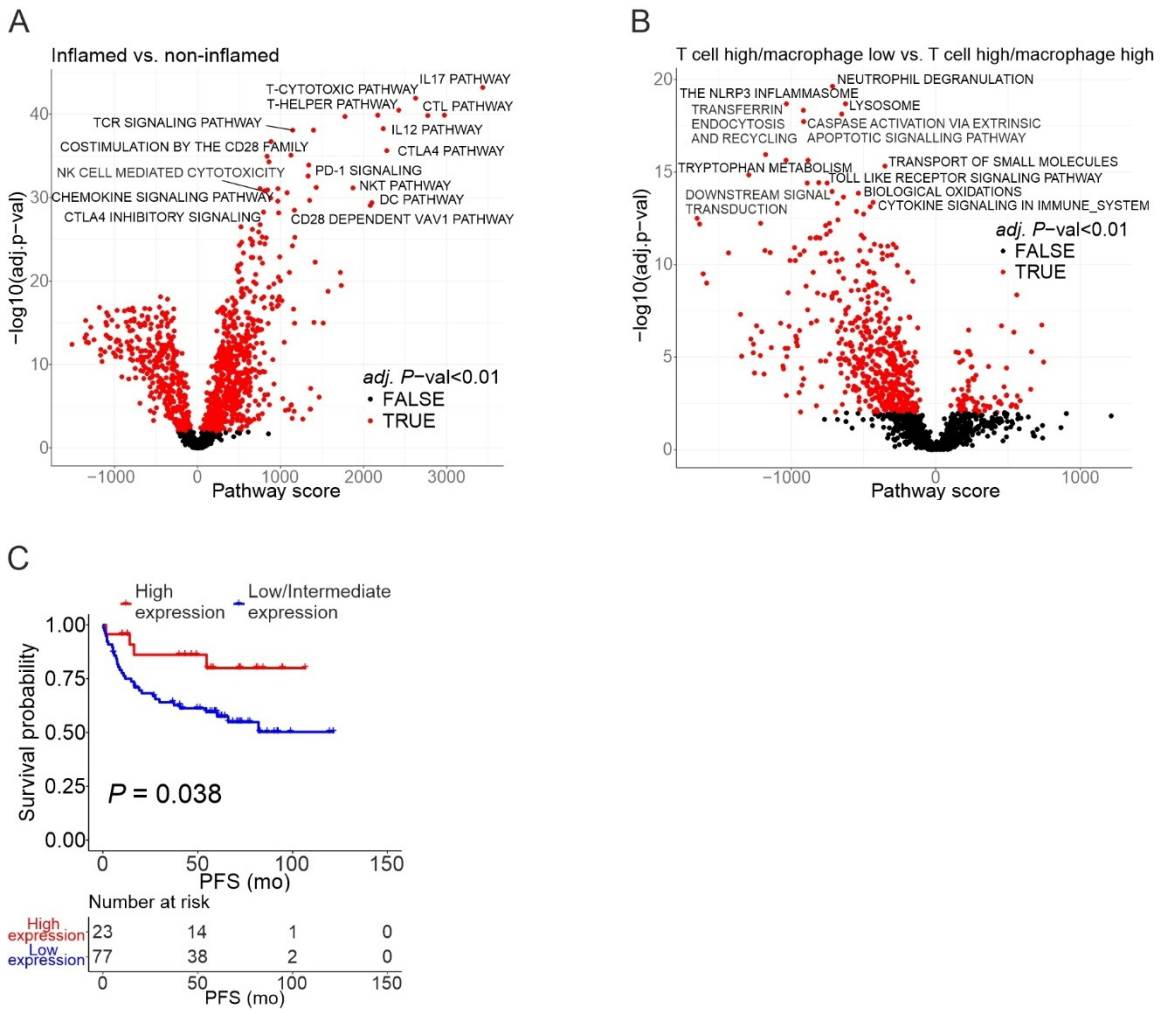

# Supplementary Fig. S11: Clinical impact of immune checkpoint expressing macrophages

**A**

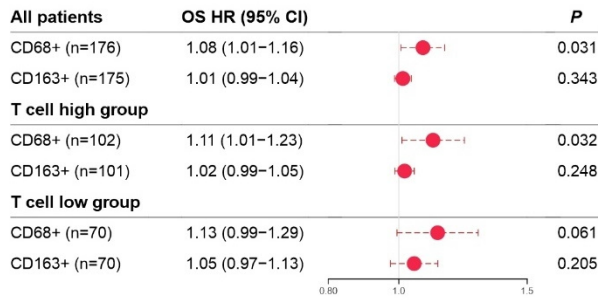

**B**

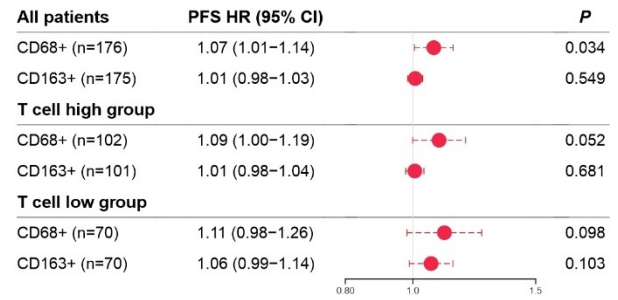

**C All patients**

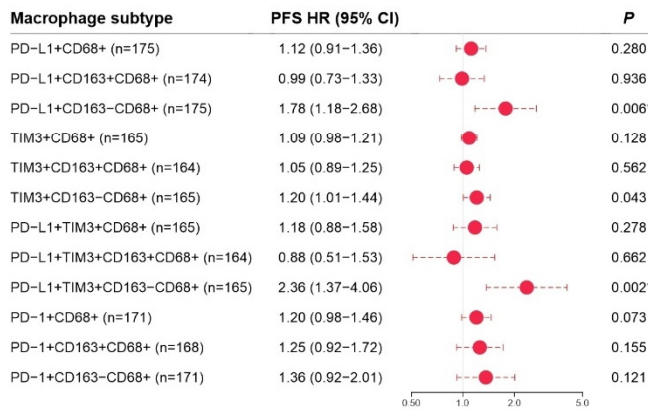

**D**

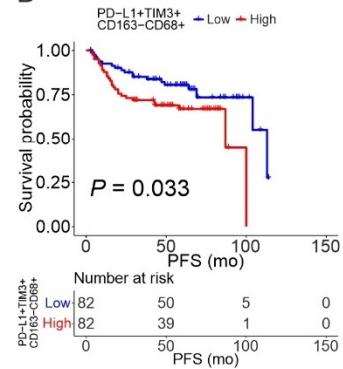

**E Model 1**

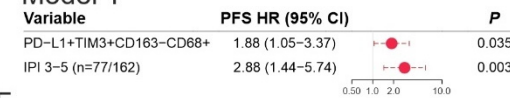

**F Model 2**

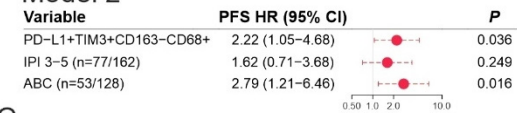

**G Model 3**

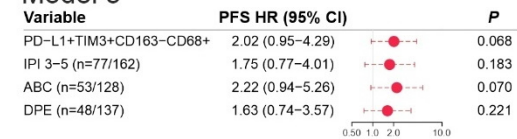

**J T cell low group**

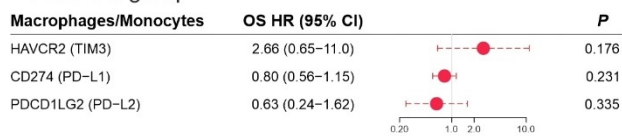

**H T cell high group**

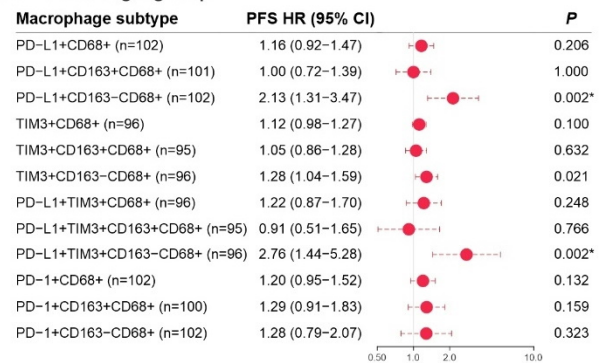

**I T cell low group**

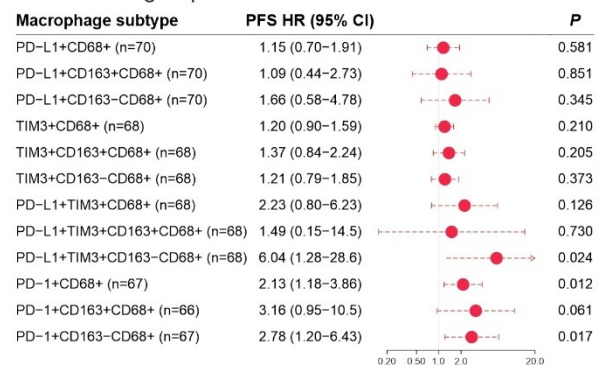



## Supplementary Fig. S12: Clinical impact of immune checkpoint expressing macrophages in non-double hit DLBCL patients

A

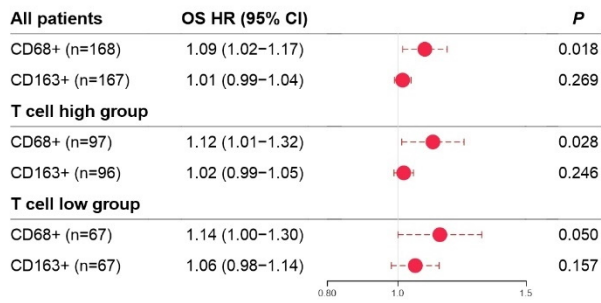

B

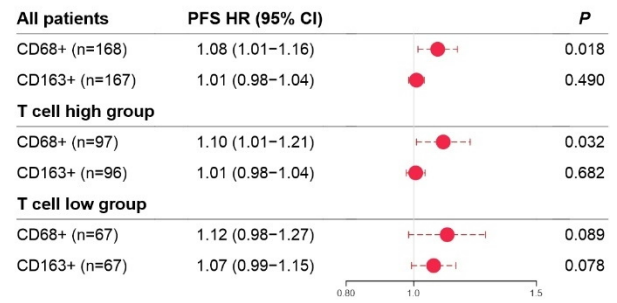

C All patients

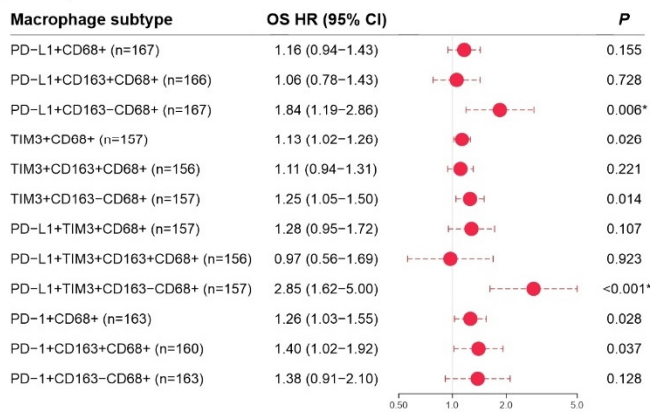

D

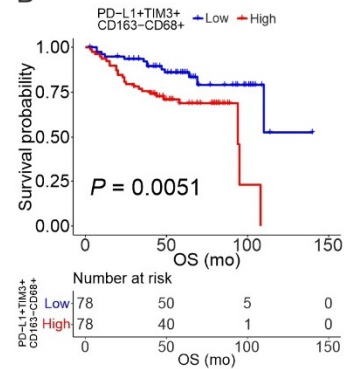

E Model 1

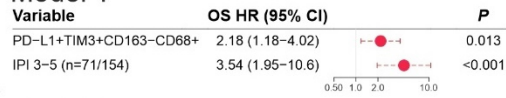

F Model 2

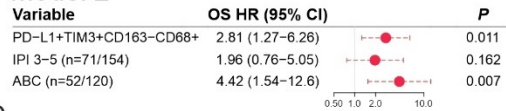

G Model 3

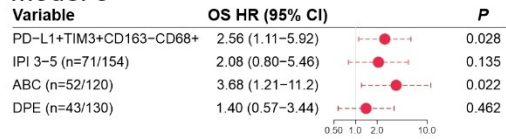

H T cell high group

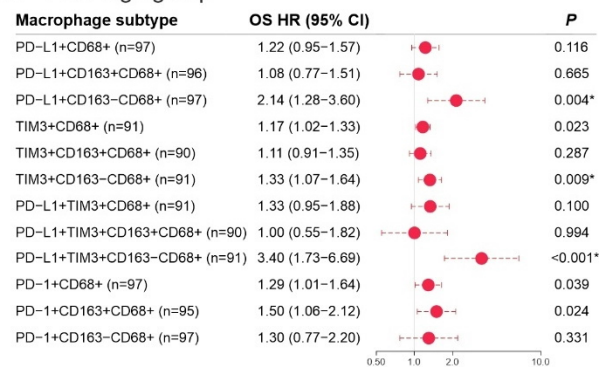

I T cell low group

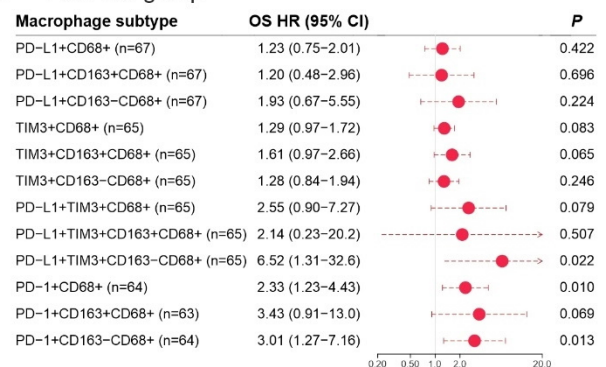

Supplement: ccr-21-3140_supplementary_figure_4_supp4.pdf [file ccr-21-3140_supplementary_figure_4_supp4.pdf]
