# Supplementary material for: Clinical Impact of Immune Cells and Their Spatial Interactions in Diffuse Large B-Cell Lymphoma Microenvironment
Source: PubMed Central journal article supplement — Clin Cancer Res. 2021 Dec 13;28(4):781–92. doi: 10.1158/1078-0432.CCR-21-3140 (PMC9377736; doi:10.1158/1078-0432.ccr-21-3140), 2021-12-13

**Supplementary Fig. S1: Consort diagram and flowchart showing the cohorts used in the study and study design**

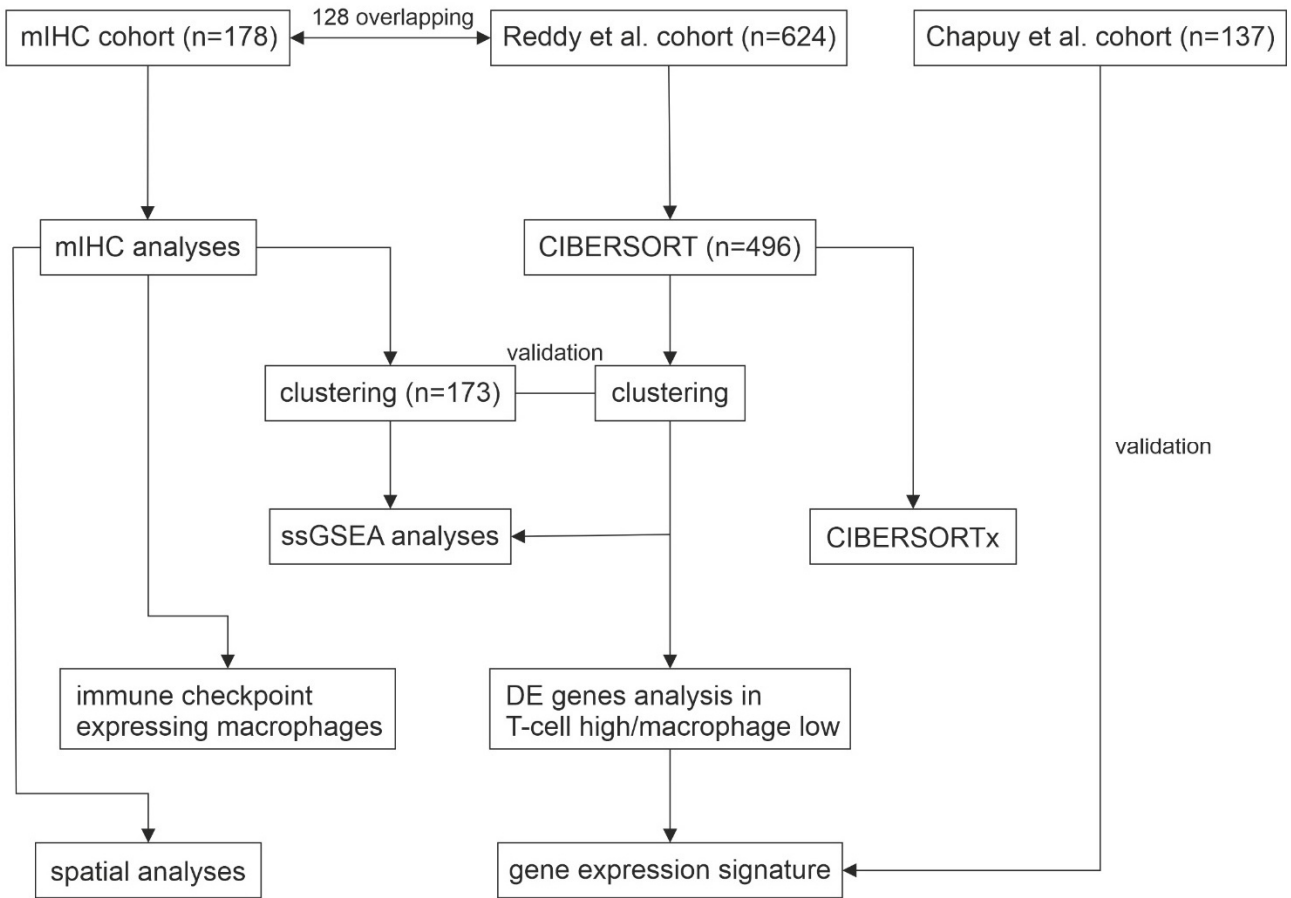

Supplement: ccr-21-3140_supplementary_figure_1_supp1.pdf [file ccr-21-3140_supplementary_figure_1_supp1.pdf]
