# Supplementary material for: Clinical Impact of Immune Cells and Their Spatial Interactions in Diffuse Large B-Cell Lymphoma Microenvironment
Source: PubMed Central journal article supplement — Clin Cancer Res. 2021 Dec 13;28(4):781–92. doi: 10.1158/1078-0432.CCR-21-3140 (PMC9377736; doi:10.1158/1078-0432.ccr-21-3140), 2021-12-13
Supplement: ccr-21-3140_supplementary_figure_2_supp2.pdf [file ccr-21-3140_supplementary_figure_2_supp2.pdf]

**Supplementary Fig. S2: Representative images from the mIHC panels with individual channels**

A

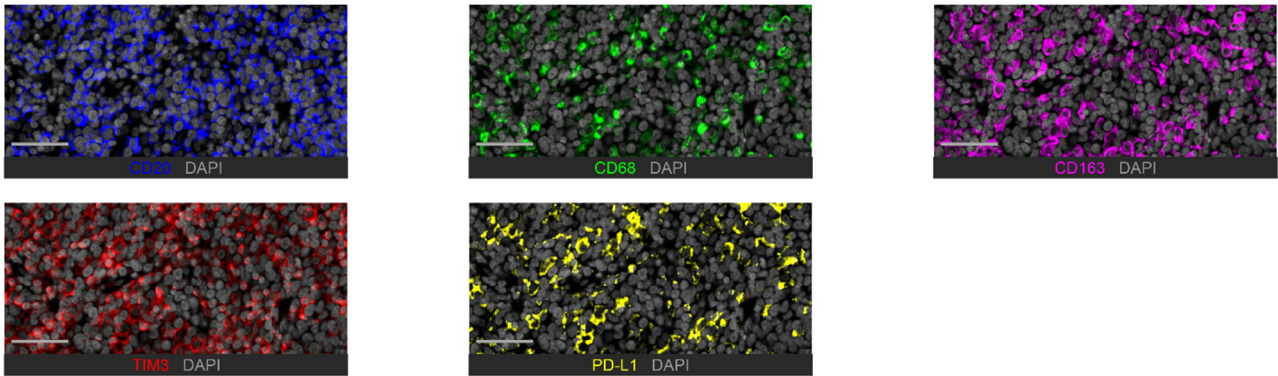

B

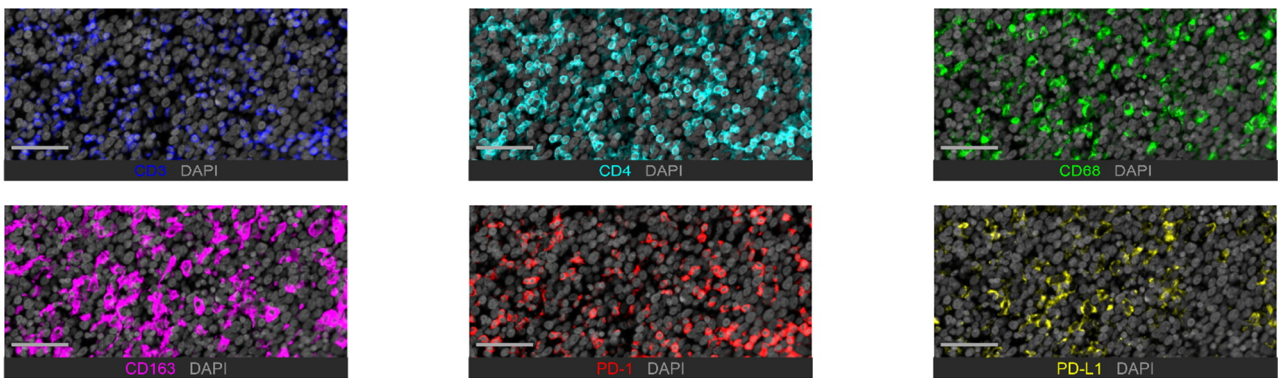

C

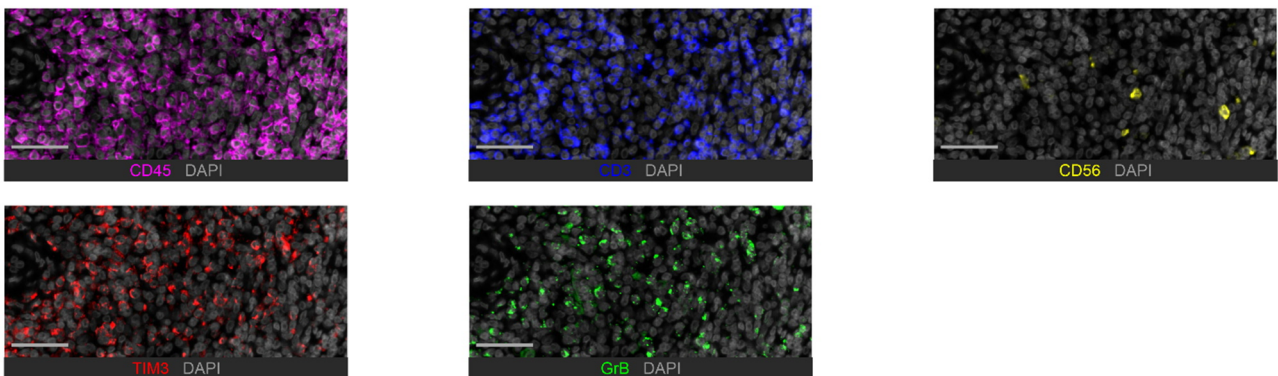

Supplementary Fig. S2: Representative images from the mIHC panels with individual channels.

A-C) Single channel images from the merged mIHC images shown in Figure 1A. A) Macrophages and B cells: CD20=blue, CD68=green, CD163=magenta, TIM3=red, PD-L1=yellow, DAPI=gray. B) Macrophages and T cells: CD3=blue, CD4=cyan, CD68=green, CD163=magenta, PD-1=red, PD-L1=yellow, DAPI=gray. C) NK cells: CD45=magenta, CD3=blue, CD56=yellow, TIM3=red, Granzyme B=green, DAPI=gray. Scale bar 50  $\mu$ m.
