# Supplementary material for: Clinical Impact of Immune Cells and Their Spatial Interactions in Diffuse Large B-Cell Lymphoma Microenvironment
Source: PubMed Central journal article supplement — Clin Cancer Res. 2021 Dec 13;28(4):781–92. doi: 10.1158/1078-0432.CCR-21-3140 (PMC9377736; doi:10.1158/1078-0432.ccr-21-3140), 2021-12-13
Supplement: ccr-21-3140_supplementary_figure_3_supp3.pdf [file ccr-21-3140_supplementary_figure_3_supp3.pdf]

**Supplementary Fig. S3: Correlation between protein and gene expression**

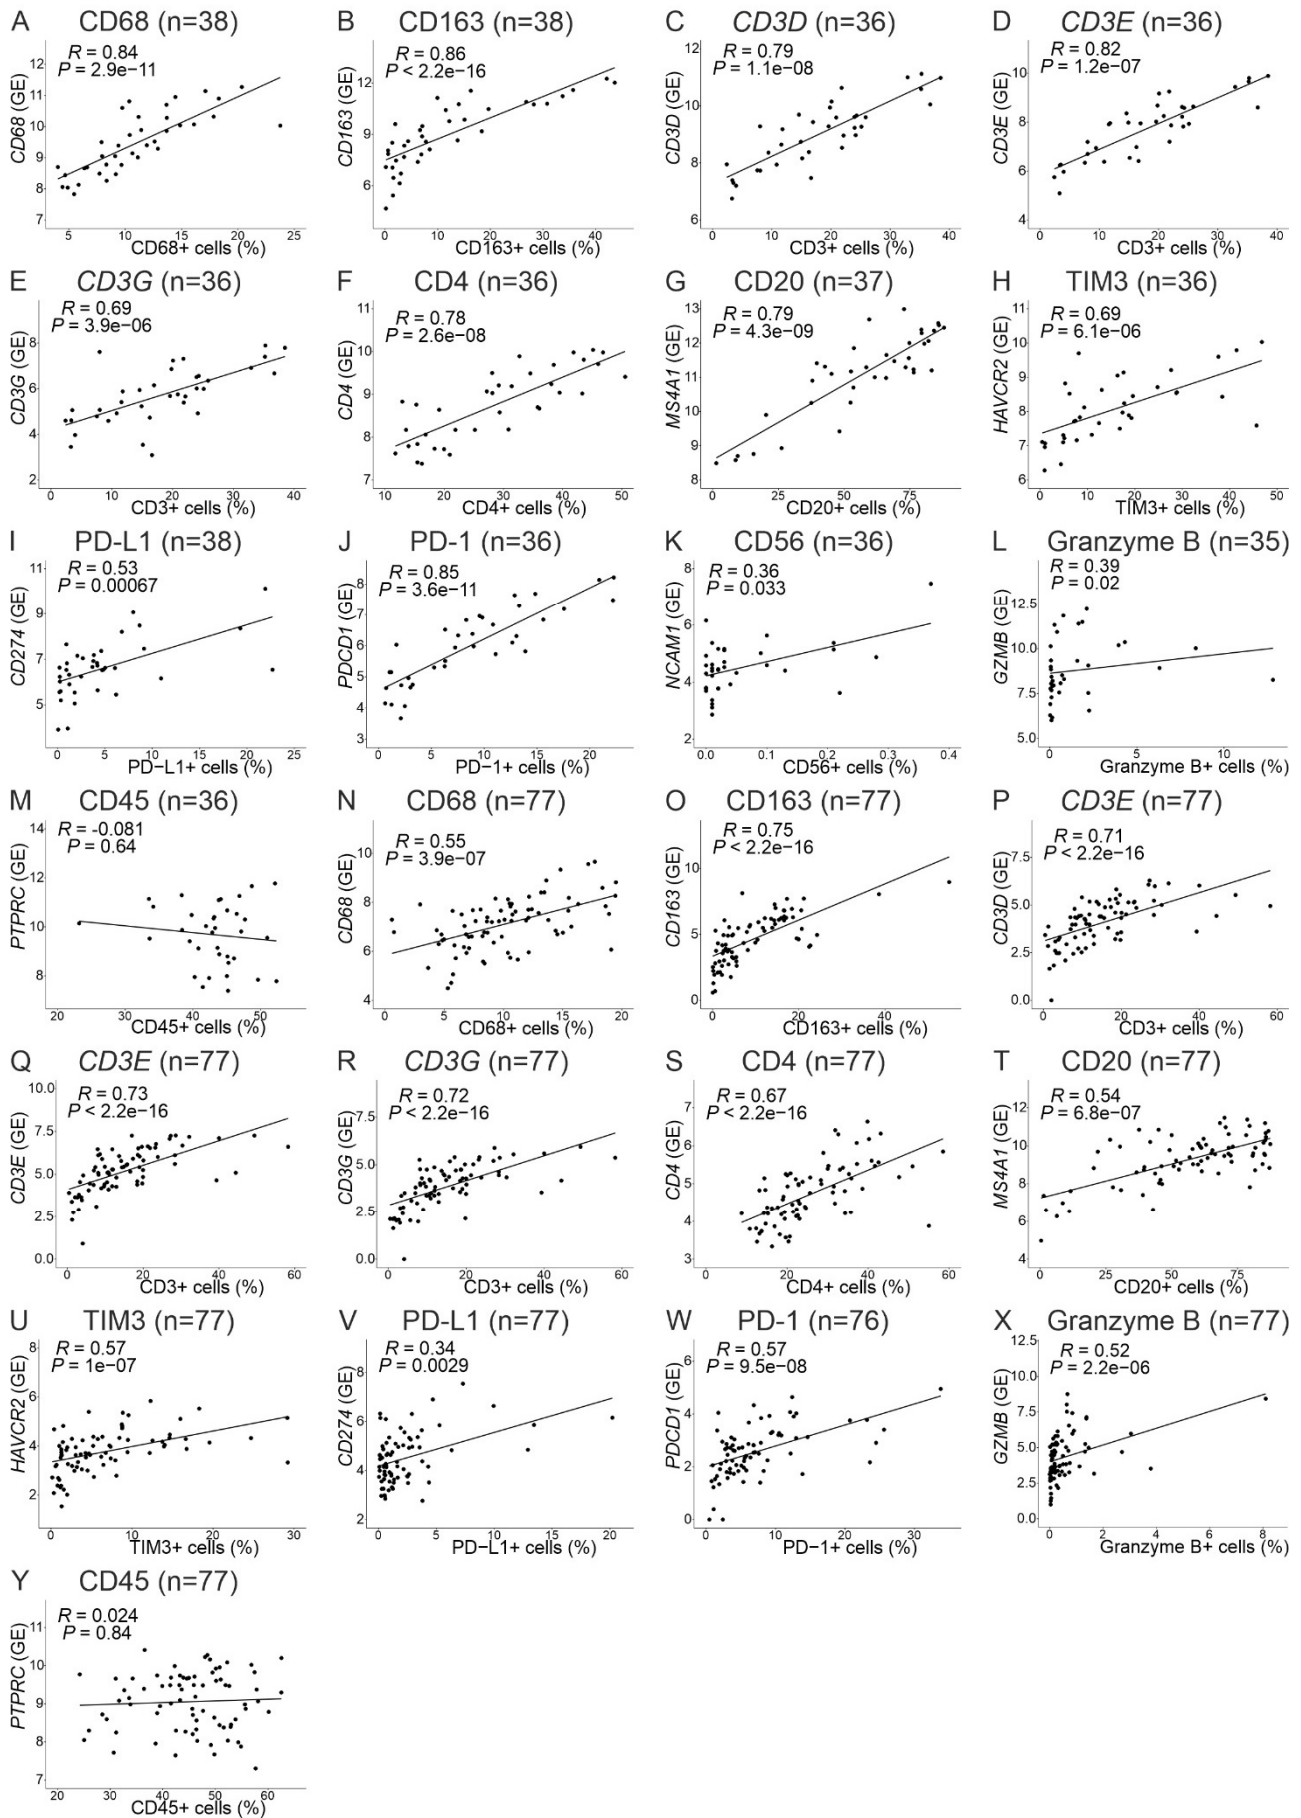

Supplementary Fig. S3: Correlation between protein and gene expression. A-Y) Spearman rank correlation between protein expression by mIHC and the corresponding gene expression by Nanostring (A-M) and RNA-sequencing (N-Y). Proportions of cells positive for a certain marker are depicted on the x-axis and the corresponding gene expression is depicted on the y-axis.
