# Supplementary material for: Clinical Impact of Immune Cells and Their Spatial Interactions in Diffuse Large B-Cell Lymphoma Microenvironment
Source: PubMed Central journal article supplement — Clin Cancer Res. 2021 Dec 13;28(4):781–92. doi: 10.1158/1078-0432.CCR-21-3140 (PMC9377736; doi:10.1158/1078-0432.ccr-21-3140), 2021-12-13
Supplement: ccr-21-3140_supplementary_figure_5_supp5.pdf [file ccr-21-3140_supplementary_figure_5_supp5.pdf]

**Supplementary Fig. S5: The clinical impact of macrophages in the T cell low group in the mIHC cohort**

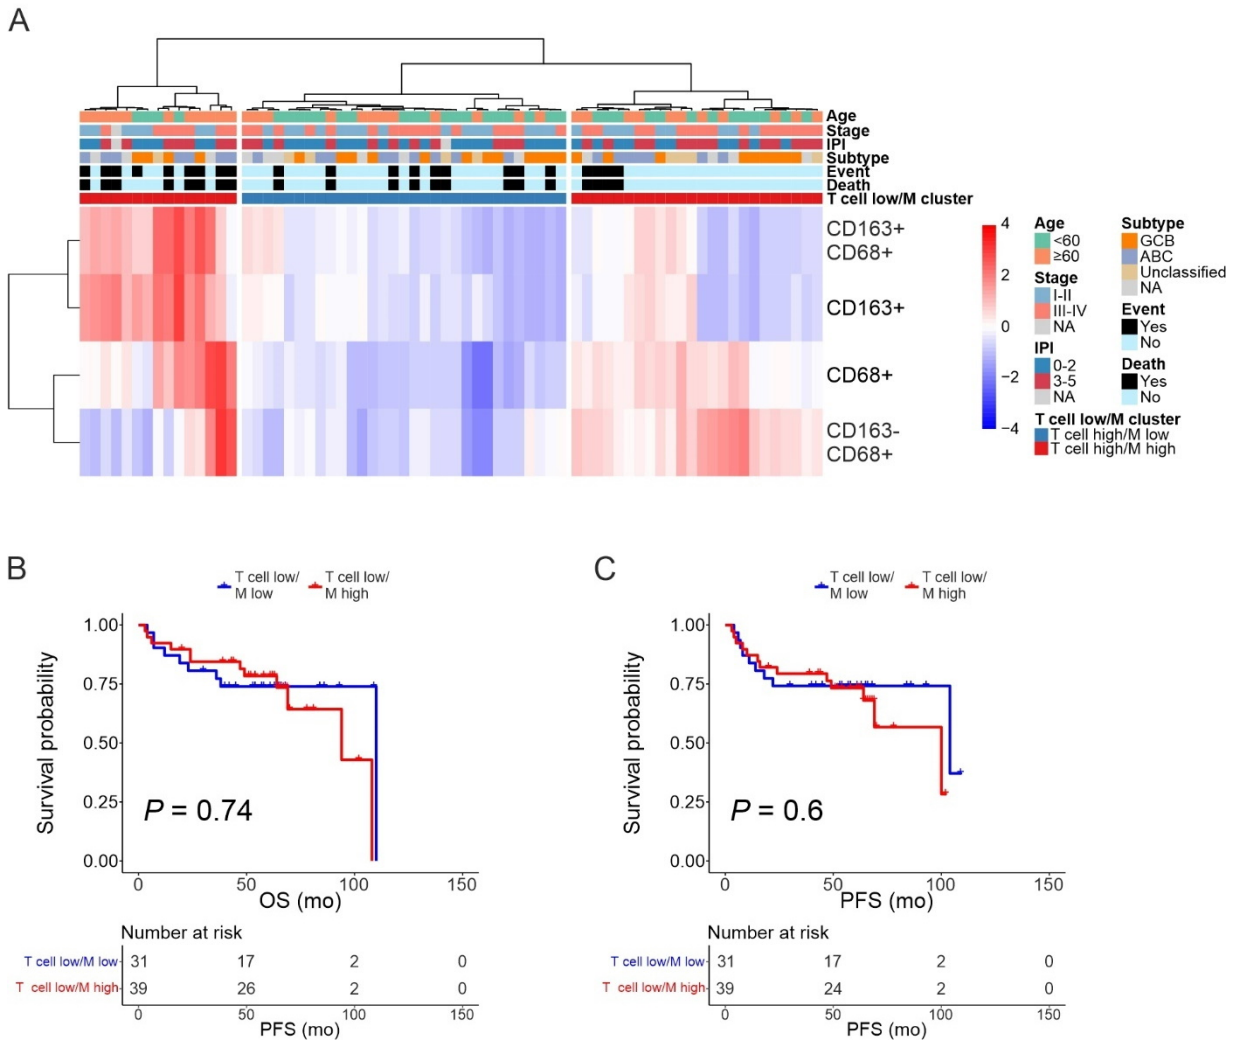

Supplementary Fig. S5: The clinical impact of macrophages in the T cell low group in the mIHC cohort. A) Unsupervised hierarchical clustering of macrophage subtypes in the T cell low group quantified by mIHC. B-C) Kaplan-Meier (log-rank test) survival plots depict OS (B) and PFS (C) in the T cell low/macrophage low (T cell low/M low) and in the T cell low/macrophage high (T cell low/M high) groups.
