# Supplementary material for: Clinical Impact of Immune Cells and Their Spatial Interactions in Diffuse Large B-Cell Lymphoma Microenvironment
Source: PubMed Central journal article supplement — Clin Cancer Res. 2021 Dec 13;28(4):781–92. doi: 10.1158/1078-0432.CCR-21-3140 (PMC9377736; doi:10.1158/1078-0432.ccr-21-3140), 2021-12-13
Supplement: ccr-21-3140_supplementary_figure_6_supp6.pdf [file ccr-21-3140_supplementary_figure_6_supp6.pdf]

**Supplementary Fig. S6: The clinical impact of macrophages in the T cell high and low groups in non-double hit DLBCL patients in the mIHC cohort**

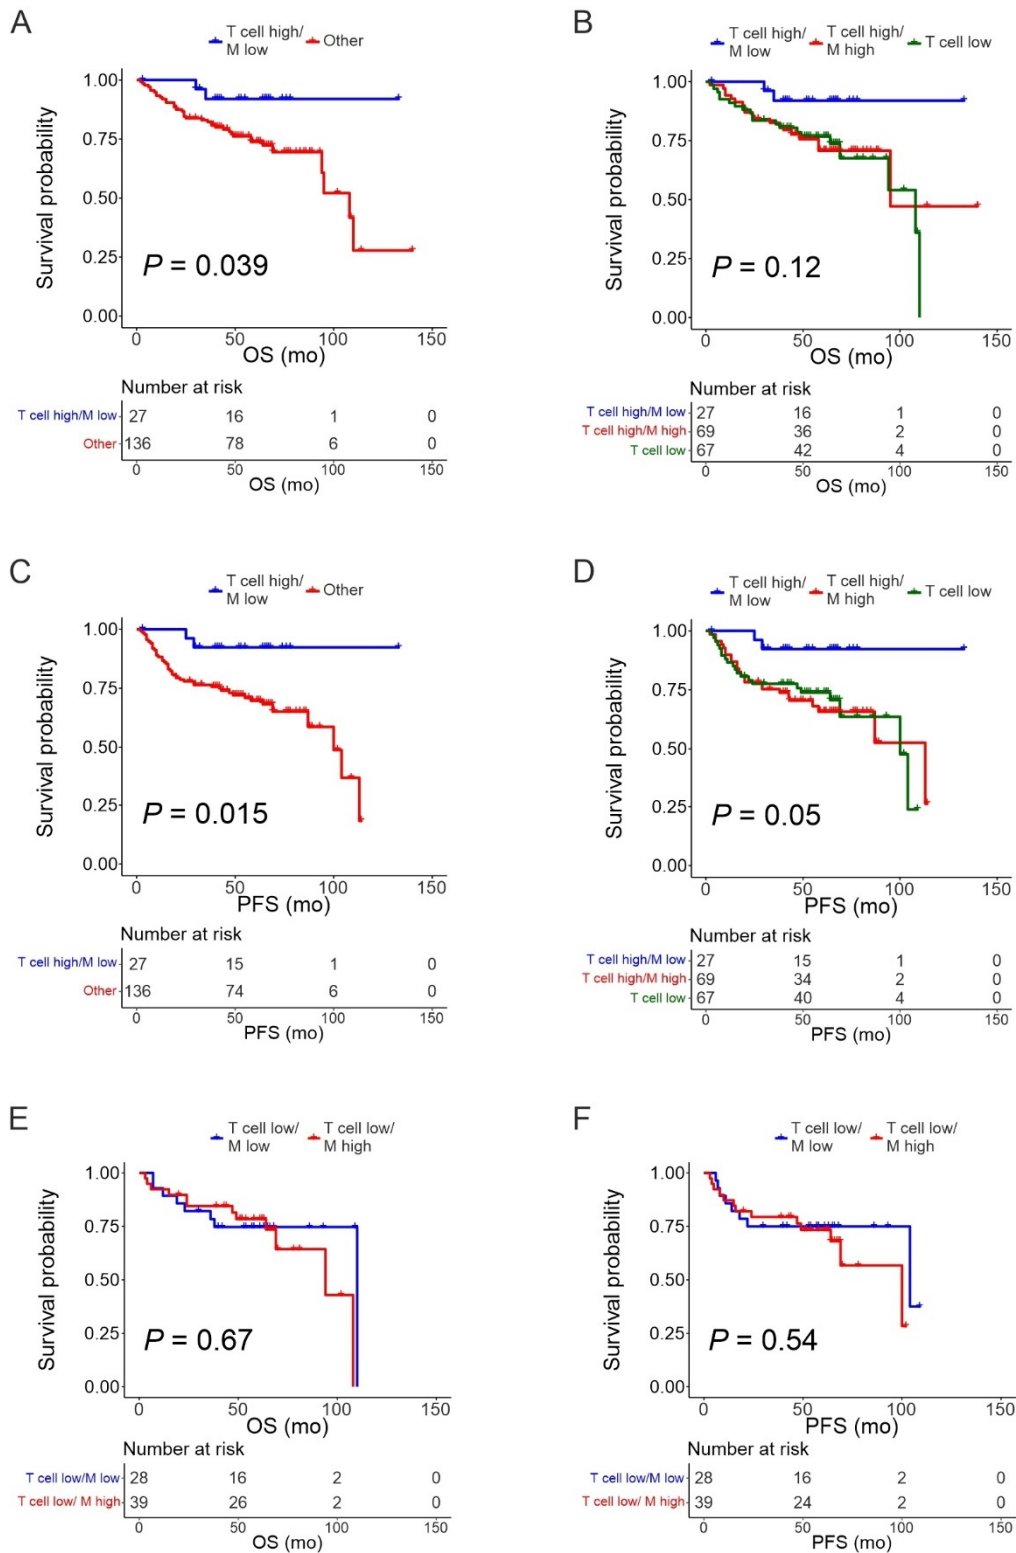

Supplementary Fig. S6: The clinical impact of macrophages in the T cell high and low groups in non-double hit DLBCL patients in the mIHC cohort. A-B) Kaplan-Meier (log-rank test) survival plots depict OS in the T cell high/macrophage low (T cell high/M low) and T cell high/macrophage high (T cell high/M high) or T cell low groups (A), as well as in the T cell high/macrophage low (T cell high/M low), T cell high/macrophage high (T cell high/M high), and the T cell low groups (B) in the mIHC cohort. C-D) Kaplan-Meier (log-rank test) survival plots depict PFS in the T cell high/macrophage low (T cell high/M low) and T cell high/macrophage high (T cell high/M high) or T cell low groups (C), as well as in the T cell high/macrophage low (T cell high/M low), T cell high/macrophage high (T cell high/M high), and T cell low groups (D) in the mIHC cohort. E-F) Kaplan-Meier (log-rank test) survival plots depict OS (E) and PFS (F) in the T cell low/macrophage low (T cell low/M low) and in the T cell low/macrophage high (T cell low/M high) groups.
