# Supplementary material for: Clinical Impact of Immune Cells and Their Spatial Interactions in Diffuse Large B-Cell Lymphoma Microenvironment
Source: PubMed Central journal article supplement — Clin Cancer Res. 2021 Dec 13;28(4):781–92. doi: 10.1158/1078-0432.CCR-21-3140 (PMC9377736; doi:10.1158/1078-0432.ccr-21-3140), 2021-12-13
Supplement: ccr-21-3140_supplementary_figure_7_supp7.pdf [file ccr-21-3140_supplementary_figure_7_supp7.pdf]

**Supplementary Fig. S7: The clinical impact of the macrophage/T cell proportion in the mIHC cohort**

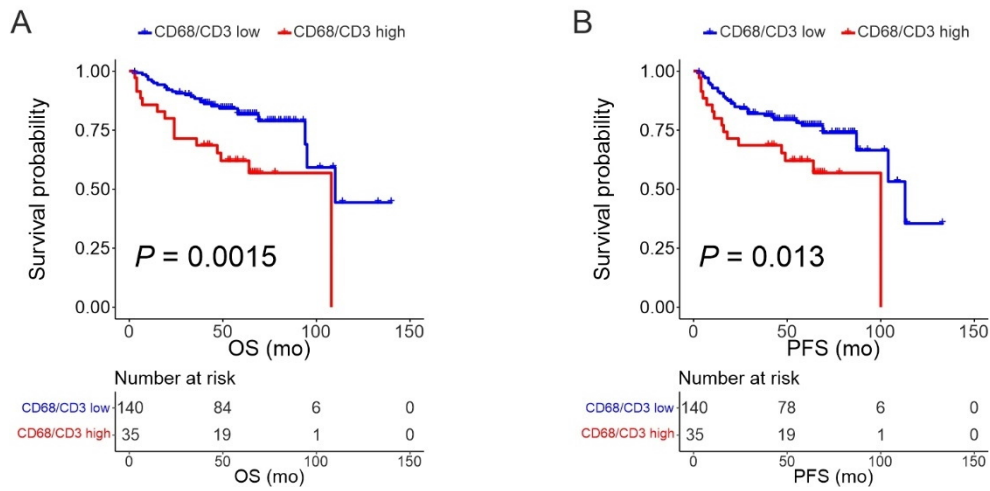

Supplementary Fig. S7: The clinical impact of the macrophage/T cell proportion in the mIHC cohort. A-B) Kaplan-Meier (log-rank test) survival plots depict OS (A) and PFS (B) in patients with low and high macrophage/T cell (CD68/CD3) proportion in their DLBCL LME. Cut-off was set at the highest fifth compared to the lowest four fifths.
