# Supplementary material for: Clinical Impact of Immune Cells and Their Spatial Interactions in Diffuse Large B-Cell Lymphoma Microenvironment
Source: PubMed Central journal article supplement — Clin Cancer Res. 2021 Dec 13;28(4):781–92. doi: 10.1158/1078-0432.CCR-21-3140 (PMC9377736; doi:10.1158/1078-0432.ccr-21-3140), 2021-12-13
Supplement: ccr-21-3140_supplementary_figure_9_supp9.pdf [file ccr-21-3140_supplementary_figure_9_supp9.pdf]

**Supplementary Fig. S9: The clinical impact of macrophages, NK cells and T cells in the LME analyzed by CIBERSORT in the Reddy et al. validation cohort**

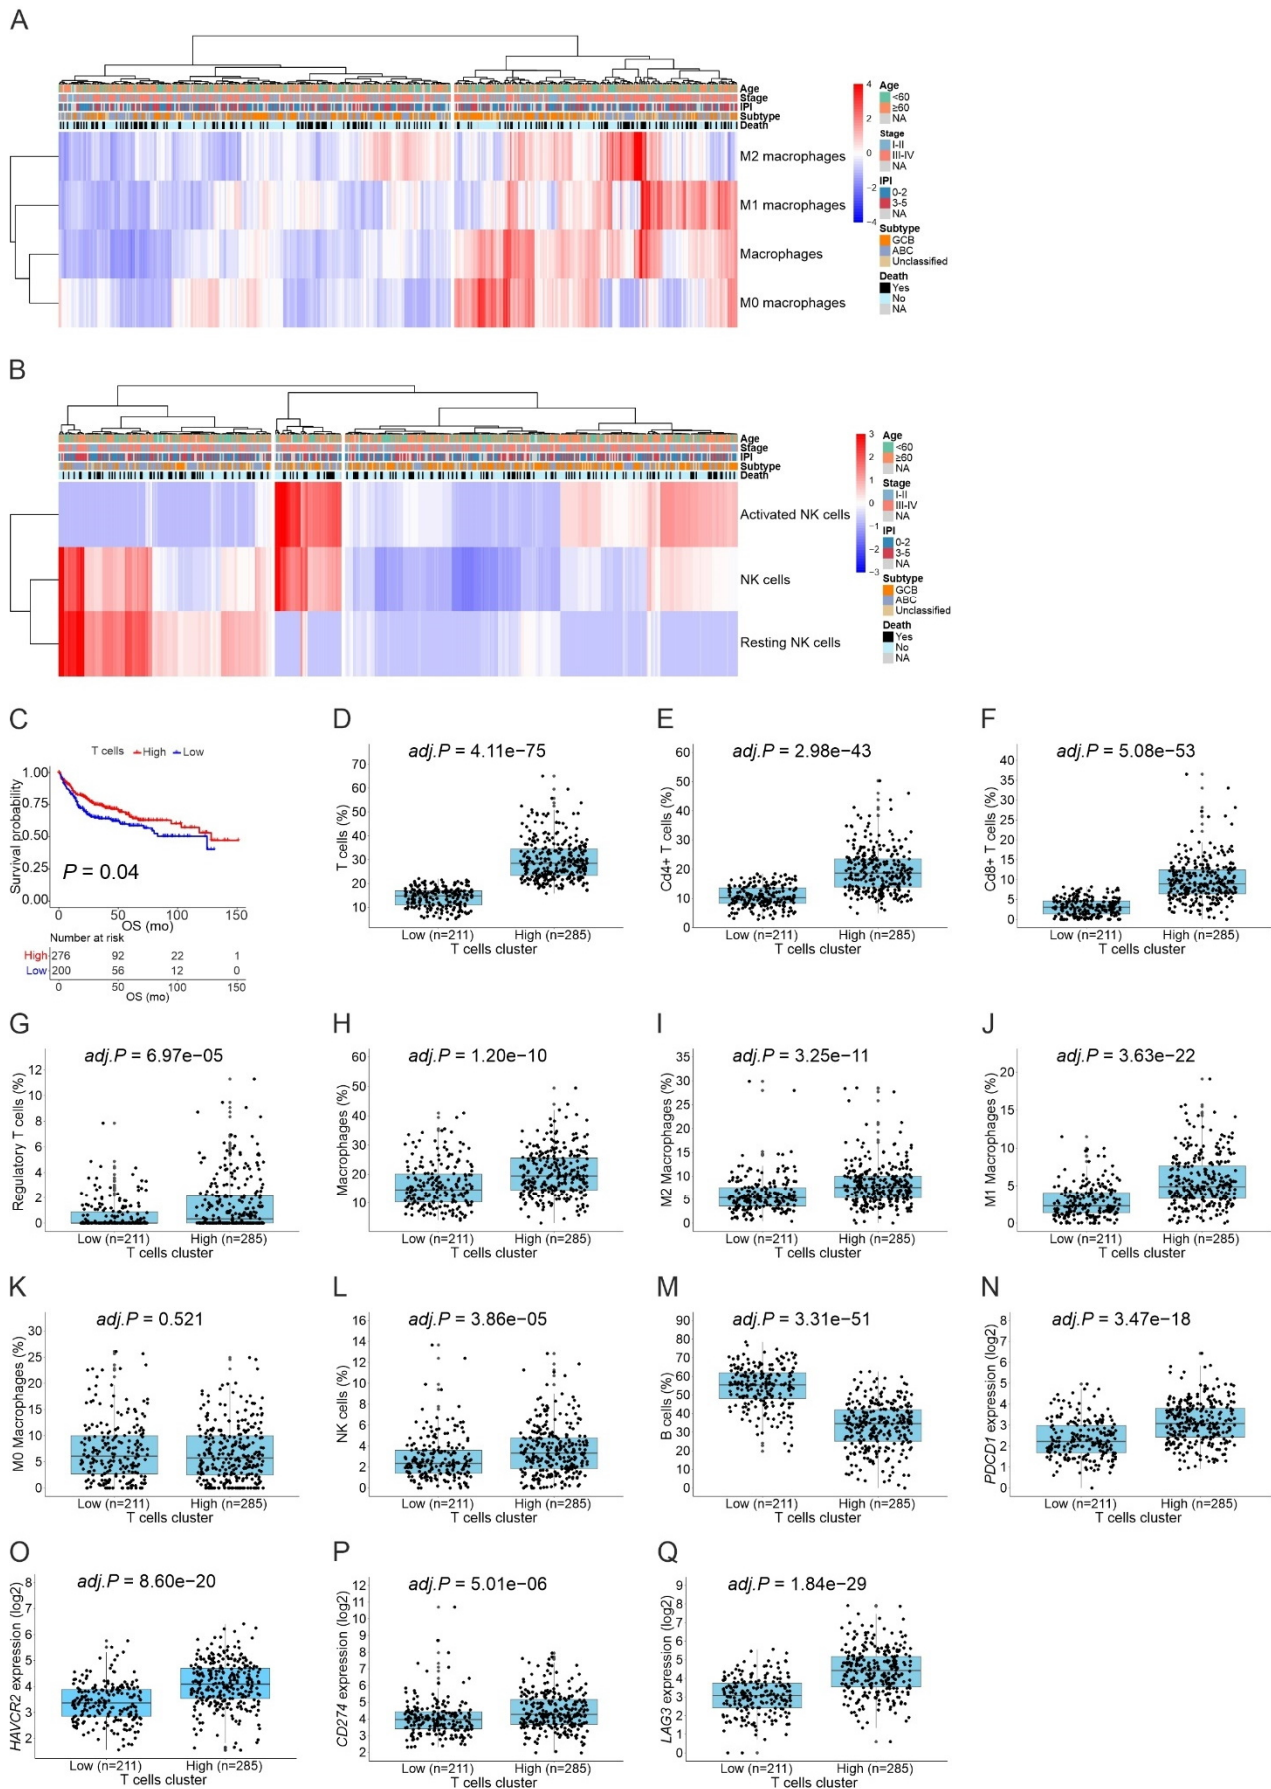

Supplementary Fig. S9: The clinical impact of macrophages, NK cells and T cells in the LME analyzed by CIBERSORT in the Reddy et al. validation cohort. A-B) Unsupervised hierarchical clustering of samples based on the proportion of different macrophage (A) and NK cell subtypes (B). C) Kaplan-Meier (log-rank test) survival plot depicting OS in the groups with high and low proportion of T cells. D-M) Boxplots depicting the proportion of T cells (D), CD4+ T cells (E), CD8+ T cells (F), regulatory T cells (G), macrophages (H), M2 macrophages (I), M1 macrophages (J), M0 macrophages (K), NK cells (L), and B-cells (M) in the groups with high and low proportion of T cells. N-Q) The expression of PDCD1 (N), HAVCR2 (O), CD274 (P), and LAG3 (Q) genes in the groups with high and low proportion of T cells.
