# Supplementary material for: Clinical Impact of Immune Cells and Their Spatial Interactions in Diffuse Large B-Cell Lymphoma Microenvironment
Source: PubMed Central journal article supplement — Clin Cancer Res. 2021 Dec 13;28(4):781–92. doi: 10.1158/1078-0432.CCR-21-3140 (PMC9377736; doi:10.1158/1078-0432.ccr-21-3140), 2021-12-13
Supplement: ccr-21-3140_supplementary_figure_10_supp10.pdf [file ccr-21-3140_supplementary_figure_10_supp10.pdf]

**Supplementary Fig. S10: Differential expression of genes and pathways between distinct LME phenotypes**

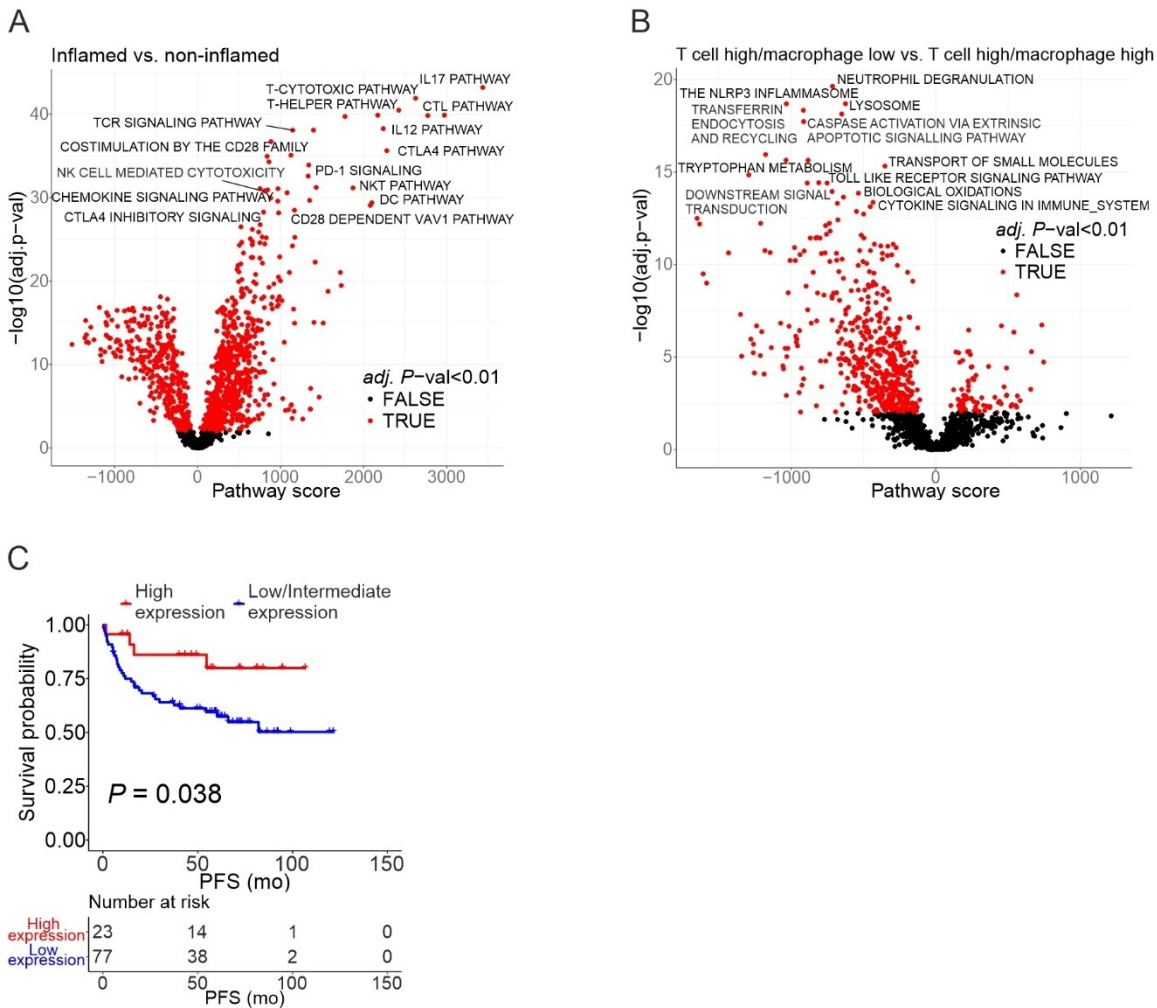

Supplementary Fig. S10: Differential expression of genes and pathways between distinct LME phenotypes. A) Volcano plot depicting differential pathway scores based on ssGSEA analysis between groups with high and low proportion of T cells (inflamed and non-inflamed) in the Reddy et al. cohort. B) Volcano plot depicting differential pathway scores based on ssGSEA analysis between the T cell high/macrophage low and T cell high/macrophage high groups in the Reddy et al cohort. C) Kaplan-Meier (log-rank test) survival plot depicts PFS in the high and low/intermediate expression groups of the T cell high/macrophage low gene expression profile in the Chapuy et al. cohort.
