# Supplementary material for: Clinical Impact of Immune Cells and Their Spatial Interactions in Diffuse Large B-Cell Lymphoma Microenvironment
Source: PubMed Central journal article supplement — Clin Cancer Res. 2021 Dec 13;28(4):781–92. doi: 10.1158/1078-0432.CCR-21-3140 (PMC9377736; doi:10.1158/1078-0432.ccr-21-3140), 2021-12-13
Supplement: ccr-21-3140_supplementary_figure_11_supp11.pdf [file ccr-21-3140_supplementary_figure_11_supp11.pdf]

# Supplementary Fig. S11: Clinical impact of immune checkpoint expressing macrophages

**A**

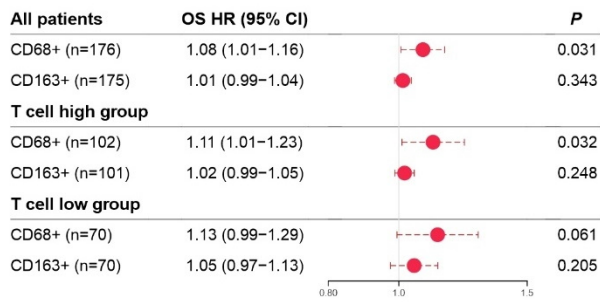

**B**

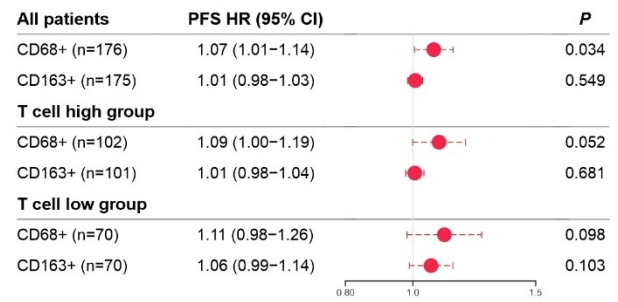

**C All patients**

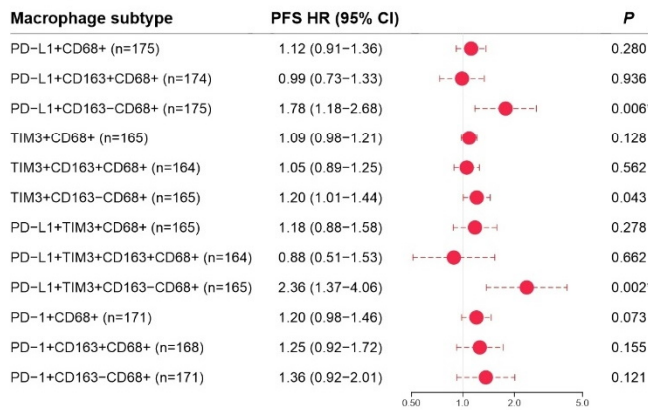

**D**

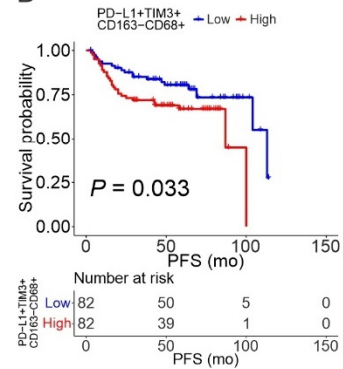

**E Model 1**

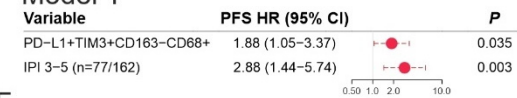

**F Model 2**

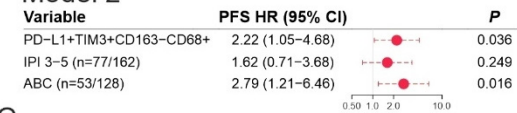

**G Model 3**

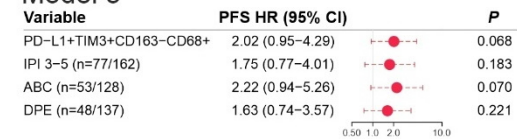

**J T cell low group**

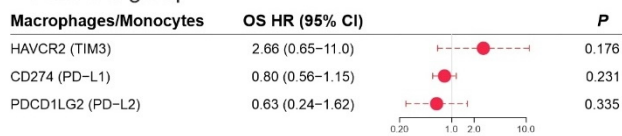

**H T cell high group**

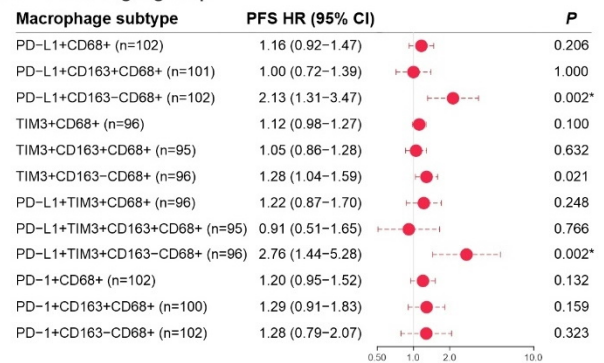

**I T cell low group**

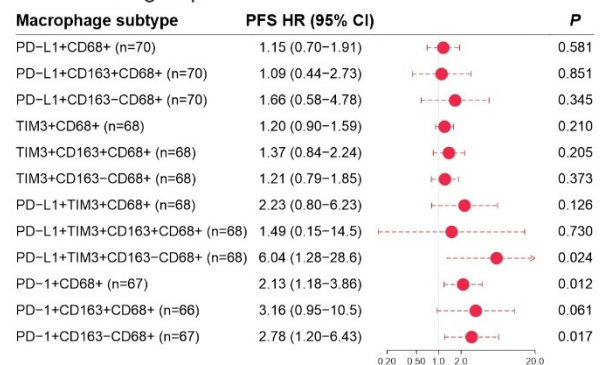

Supplementary Fig. S11: Clinical impact of immune checkpoint expressing macrophages. A-B) Forest plot visualizing the impact of macrophages and CD163+ macrophages on OS (A) and PFS (B) in the entire mIHC cohort and in the T cell high and low groups, as evaluated by Cox regression univariate analyses with continuous variables. Bad cores were removed from the analyses. C) Forest plot visualizing the impact of immune checkpoint expressing macrophages on PFS in the mIHC cohort, as evaluated by Cox regression univariate analyses with continuous variables. Bad cores were removed from the analyses. D) Kaplan-Meier (log-rank test) survival plot depicts PFS in patients with high and low proportion of PD-L1+TIM3+CD163- macrophages using median cut-off in the mIHC cohort. E-G) Forest plots visualizing the impact of PD-L1+TIM3+CD163- macrophages on PFS in Cox regression multivariate analyses with IPI (E), IPI and molecular subtype (F), and IPI, molecular subtype, and double protein expression (DPE) (G) in the mIHC cohort. H-I) Forest plots visualizing the impact of immune checkpoint expressing macrophages on PFS in the T cell high (H) and low (I) groups, as evaluated by Cox regression univariate analyses with continuous variables in the mIHC cohort. Bad cores were removed from analyses. J) Forest plot visualizing the impact of the gene expression of immune checkpoint molecules in macrophages, inferred with CIBERSORTx, on OS in the T cell low group in the Reddy et al. cohort, as evaluated by Cox regression univariate analyses with continuous variables. \*P≤0.05 after FDR correction.
