# Supplementary material for: Clinical Impact of Immune Cells and Their Spatial Interactions in Diffuse Large B-Cell Lymphoma Microenvironment
Source: PubMed Central journal article supplement — Clin Cancer Res. 2021 Dec 13;28(4):781–92. doi: 10.1158/1078-0432.CCR-21-3140 (PMC9377736; doi:10.1158/1078-0432.ccr-21-3140), 2021-12-13
Supplement: ccr-21-3140_supplementary_figure_12_supp12.pdf [file ccr-21-3140_supplementary_figure_12_supp12.pdf]

## Supplementary Fig. S12: Clinical impact of immune checkpoint expressing macrophages in non-double hit DLBCL patients

A

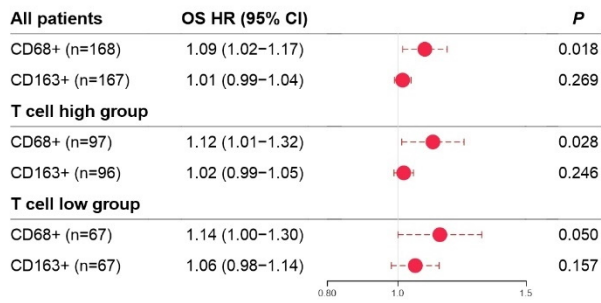

B

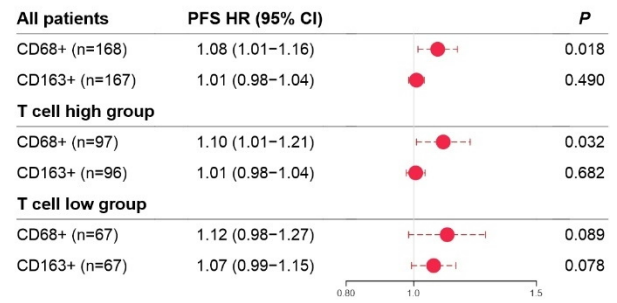

C All patients

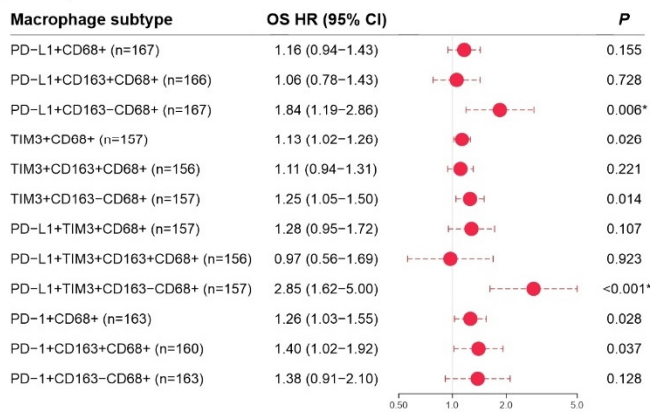

D

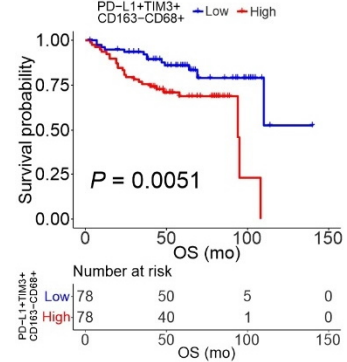

E Model 1

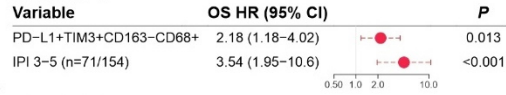

F Model 2

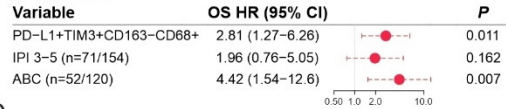

G Model 3

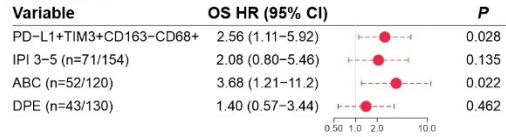

H T cell high group

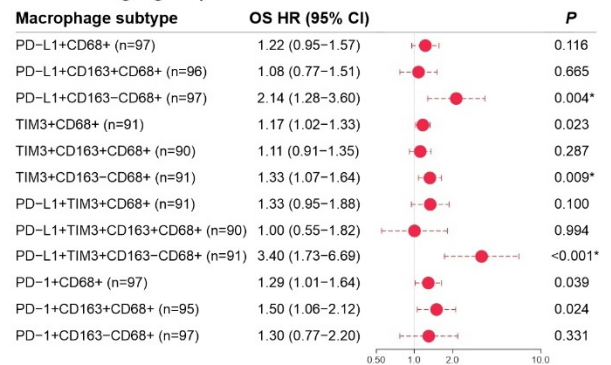

I T cell low group

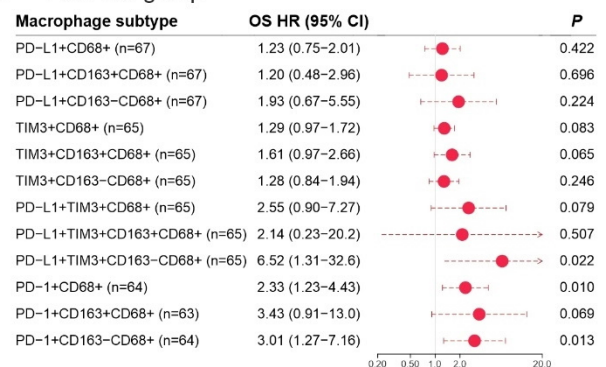

Supplementary Fig. S12: Clinical impact of immune checkpoint expressing macrophages in non-double hit DLBCL patients. A-B) Forest plot visualizing the impact of macrophages and CD163+ macrophages on OS (A) and PFS (B) in the entire mIHC cohort and in the T cell high and T cell low groups, as evaluated by Cox regression univariate analyses with continuous variables. C) Forest plot visualizing the impact of immune checkpoint expressing macrophages on OS in the mIHC cohort, as evaluated by Cox regression univariate analyses with continuous variables. D) Kaplan-Meier (log-rank test) survival plot depicts OS in the patients with high and low proportion of PD-L1+TIM3+CD163-macrophages using median cut-off in the mIHC cohort. E-G) Forest plots visualizing the impact of PD-L1+TIM3+CD163-macrophages on OS in Cox multivariate analyses with IPI (E), IPI and molecular subtype (F), and IPI, molecular subtype, and double protein expression (DPE) (G) in the mIHC cohort. H-I) Forest plots visualizing the impact of immune checkpoint expressing macrophages on OS in the T cell high (H) and low (I) groups, as evaluated by Cox regression univariate analyses with continuous variables in the mIHC cohort. Double-hit lymphomas were excluded from all analyses. Bad cores were also removed from all analyses. \* $P \leq 0.05$  after FDR correction.
