# Supplementary material for: Clinical Impact of Immune Cells and Their Spatial Interactions in Diffuse Large B-Cell Lymphoma Microenvironment
Source: PubMed Central journal article supplement — Clin Cancer Res. 2021 Dec 13;28(4):781–92. doi: 10.1158/1078-0432.CCR-21-3140 (PMC9377736; doi:10.1158/1078-0432.ccr-21-3140), 2021-12-13
Supplement: ccr-21-3140_supplementary_tables_s1-5_11_supps1.pdf [file ccr-21-3140_supplementary_tables_s1-5_11_supps1.pdf]

## Supplementary Tables

**Supplementary Table S1: Multiplex immunohistochemistry (mIHC) panels used to characterize different immunophenotypes of cells in the lymphoma microenvironment**

|             | Panel 1                                                    | Panel 2                                                    | Panel 3                                                         |
|-------------|------------------------------------------------------------|------------------------------------------------------------|-----------------------------------------------------------------|
| 1st round   |                                                            |                                                            |                                                                 |
| TSA-488     | M-anti-CD68<br>(Abcam; ab955, clone KP1)<br>1:200          | M-anti-PD-1<br>(LSBio; B12784, clone 3C6)<br>1:200         | M-anti-CD3<br>(Abcam; ab17143, clone F7.2.38)<br>1:100; 1,5h RT |
| TSA-555     | R-anti-PD-L1<br>(CST <sup>1</sup> ; 13684)<br>1:200        | R-anti-PD-L1<br>(CST; 13684)<br>1:200                      | R-anti-CD56<br>(Cell Marque; 156R-95)<br>1:1000                 |
| Alexa-647   | R-anti-Tim-3<br>(CST; 45208, clone D5D5R)<br>1:100         | R-anti-CD4<br>(Abcam; ab133616, clone EPR6855)<br>1:50     | R-anti-Tim-3<br>(CST; 45208, clone D5D5R)<br>1:100              |
| Alexa-750   | M-anti-CD20<br>(Thermo; MS-340-s, clone L26)<br>1:50       | M-anti-CD68<br>(Abcam; ab955, clone KP1)<br>1:50           | M-anti-CD45<br>(Dako; M0701, clone 2B11 + PD7/26)<br>1:50       |
| Bleach boil |                                                            |                                                            |                                                                 |
| 2nd round   |                                                            |                                                            |                                                                 |
| Alexa 647   |                                                            | M-anti-CD3<br>(Abcam; ab17143, clone F7.2.38)<br>1:50      |                                                                 |
| Alexa-750   | R-anti-CD163<br>(Abcam; ab188571, clone EPR14643)<br>1:200 | R-anti-CD163<br>(Abcam; ab188571, clone EPR14643)<br>1:200 | R-anti-Granzyme B<br>(Abcam; ab4059)<br>1:100                   |

<sup>1</sup>CST, Cell Signaling Technologies

**Supplementary Table S2: Univariate analysis of established risk factors in the mIHC cohort**

| Variable                                     | OS HR (95% CI)    | OS <i>P</i> | PFS HR (95% CI)  | PFS <i>P</i> |
|----------------------------------------------|-------------------|-------------|------------------|--------------|
| IPI <sup>a</sup> (3-5 vs. 0-2)               | 4.32 (2.06-9.09)  | <0.001      | 3.12 (1.67-5.83) | <0.001       |
| Molecular subtype (ABC vs. GCB) <sup>b</sup> | 4.90 (1.98-12.09) | <0.001      | 3.22 (1.49-6.98) | 0.003        |
| MYC and BCL2 double protein expression       | 2.49 (1.28-4.84)  | 0.007       | 2.28 (1.22-4.29) | 0.010        |

<sup>a</sup>IPI, international prognostic index

<sup>b</sup>ABC, activated B-cell like; GCB, germinal center B-cell like

**Supplementary Table S3: Amounts of different immune cells and their phenotypes analyzed by mIHC**

|                                          | Immunophenotype        | Mean    | Median  | Min    | Max    |
|------------------------------------------|------------------------|---------|---------|--------|--------|
| T cells                                  | CD3+                   | 16.8397 | 15.121  | 0.4    | 61.45  |
|                                          | CD4+CD3+               | 12.8438 | 10.0544 | 0.3    | 49.16  |
|                                          | CD4-CD3+               | 7.3612  | 6.4367  | 0.18   | 22.85  |
| Macrophages                              | CD68+                  | 10.2969 | 9.8532  | 0.58   | 23.75  |
|                                          | CD163+                 | 10.2712 | 6.4109  | 0.04   | 54.93  |
|                                          | CD163+CD68+            | 4.0739  | 2.7442  | 0.02   | 16.21  |
|                                          | CD163-CD68+            | 6.2587  | 5.7123  | 0.38   | 16.7   |
|                                          | CD4+CD68+              | 6.7644  | 6.1136  | 0.49   | 21.13  |
| NK cells                                 | CD56+CD3-              | 0.0315  | 0.0072  | 0      | 0.97   |
|                                          | CD56+CD3-CD45+         | 0.0155  | 0.0037  | 0      | 0.26   |
| B cells                                  | CD20+                  | 56.4643 | 60.3967 | 0.08   | 92.16  |
| Unspecified immune cells                 | CD45+                  | 44.6614 | 45.1574 | 8.54   | 62.53  |
|                                          | CD3-CD45+              | 36.264  | 36.5055 | 1.36   | 59.18  |
|                                          | CD4+                   | 26.5679 | 25.3837 | 6.11   | 58.49  |
|                                          | CD3-CD4+               | 13.7241 | 12.8978 | 2.14   | 38.01  |
|                                          | CD56+                  | 0.0552  | 0.0098  | 0      | 3.21   |
| Cytotoxic cells                          | GrB+                   | 0.9858  | 0.212   | 0      | 32.85  |
|                                          | GrB+CD45+              | 0.4182  | 0.1089  | 0      | 8.02   |
|                                          | GrB+CD3+               | 0.369   | 0.056   | 0      | 24.86  |
|                                          | GrB+CD56+CD3-          | 0.0011  | 0       | 0      | 0.11   |
|                                          | GrB+CD56+CD3-CD45+     | 0.0003  | 0       | 0      | 0.01   |
|                                          | GrB+CD3-               | 0.6144  | 0.1474  | 0      | 8      |
| Immune checkpoint molecules              | PD-L1+                 | 2.9993  | 1.325   | 0.01   | 22.69  |
|                                          | TIM3+                  | 9.1892  | 5.5684  | 0.16   | 46.8   |
|                                          | PD-1+                  | 8.2321  | 6.3024  | 0.47   | 33.78  |
|                                          | PD-L1+TIM3+            | 1.1368  | 0.3799  | 0      | 12.6   |
|                                          | PD-L1+PD-1+            | 1.2925  | 0.6881  | 0      | 8.49   |
| Immune checkpoint expressing T cells     | PD-1+CD3+              | 5.148   | 3.9601  | 0.1    | 29.81  |
|                                          | TIM3+CD3+              | 3.3353  | 1.8406  | 0.02   | 22.59  |
|                                          | PD-L1+CD3+             | 1.3273  | 0.5554  | 0      | 11.05  |
|                                          | PD-L1+PD-1+CD3+        | 0.786   | 0.3494  | 0      | 5.46   |
|                                          | PD-1+CD4+CD3+          | 3.7949  | 2.4235  | 0.07   | 25.84  |
|                                          | PD-L1+CD4+CD3+         | 1.0719  | 0.476   | 0      | 9.55   |
|                                          | PD-L1+PD-1+CD4+CD3+    | 0.6634  | 0.2942  | 0      | 5.11   |
|                                          | PD-1+CD4-CD3+          | 1.3531  | 0.9965  | 0.02   | 7.73   |
|                                          | PD-L1+CD4-CD3+         | 0.2554  | 0.0844  | 0      | 3.95   |
|                                          | PD-L1+PD-1+CD4-CD3+    | 0.1226  | 0.0627  | 0.0003 | 1.0317 |
| Immune checkpoint expressing macrophages | TIM3+CD68+             | 2.2954  | 1.536   | 0.01   | 14.63  |
|                                          | PD-L1+CD68+            | 1.0684  | 0.5386  | 0      | 6.8    |
|                                          | PD-1+CD68+             | 1.0459  | 0.7047  | 0.02   | 7.2    |
|                                          | PD-L1+TIM3+CD68+       | 0.5807  | 0.2541  | 0      | 5.35   |
|                                          | PD-L1+PD-1+CD68+       | 0.304   | 0.1474  | 0      | 3.02   |
|                                          | TIM3+CD163+            | 2.7969  | 0.7445  | 0      | 24.74  |
|                                          | PD-L1+CD163+           | 1.1669  | 0.2674  | 0      | 13.61  |
|                                          | PD-1+CD163+            | 1.2176  | 0.4807  | 0      | 11.35  |
|                                          | PD-L1+TIM3+CD163+      | 0.5568  | 0.0975  | 0      | 9.3    |
|                                          | PD-L1+PD-1+CD163+      | 0.4065  | 0.0859  | 0      | 4.11   |
|                                          | TIM3+CD163+CD68+       | 1.1399  | 0.4775  | 0      | 10.44  |
|                                          | PD-L1+CD163+CD68+      | 0.5983  | 0.1922  | 0      | 5.77   |
|                                          | PD-1+CD163+CD68+       | 0.4751  | 0.1925  | 0      | 4.9    |
|                                          | PD-L1+TIM3+CD163+CD68+ | 0.3122  | 0.0752  | 0      | 4.49   |
|                                          | PD-L1+PD-1+CD163+CD68+ | 0.1753  | 0.0457  | 0      | 2.64   |
|                                          | TIM3+CD163-CD68+       | 1.1614  | 0.6767  | 0.01   | 8.24   |
|                                          | PD-L1+CD163-CD68+      | 0.4742  | 0.2972  | 0      | 3.18   |
|                                          | PD-1+CD163-CD68+       | 0.5771  | 0.4006  | 0.01   | 3.79   |

|                                                                  |                                    |         |         |      |       |
|------------------------------------------------------------------|------------------------------------|---------|---------|------|-------|
|                                                                  | PD-L1+TIM3+CD163-CD68+             | 0.2703  | 0.1357  | 0    | 2.13  |
|                                                                  | PD-L1+PD-1+CD163-CD68+             | 0.1316  | 0.0807  | 0    | 0.91  |
|                                                                  | PD-L1+CD4+CD68+                    | 0.7404  | 0.3338  | 0    | 6.31  |
|                                                                  | PD-1+CD4+CD68+                     | 0.8859  | 0.606   | 0.02 | 6.61  |
|                                                                  | PD-L1+PD-1+CD4+CD68+               | 0.2743  | 0.1329  | 0    | 2.79  |
| Immune checkpoint expressing NK cells                            | TIM3+CD56+CD3-                     | 0.0064  | 0.0012  | 0    | 0.08  |
|                                                                  | TIM3+CD56+CD3-CD45+                | 0.0044  | 0.0007  | 0    | 0.08  |
| Immune checkpoint expressing B cells                             | TIM3+CD20+                         | 4.8583  | 2.4151  | 0    | 34.7  |
|                                                                  | PD-L1+CD20+                        | 1.4918  | 0.6564  | 0    | 20.75 |
|                                                                  | PD-L1+TIM3+CD20+                   | 0.6303  | 0.2138  | 0    | 11.47 |
| Unspecified immune checkpoint expressing cells                   | TIM3+CD45+                         | 6.226   | 3.4665  | 0.02 | 36.24 |
|                                                                  | TIM3+CD3-                          | 6.2015  | 3.2318  | 0.01 | 41.05 |
|                                                                  | TIM3+CD68-                         | 6.4251  | 3.0131  | 0.03 | 35.21 |
|                                                                  | TIM3+CD20-                         | 3.8481  | 0.8507  | 0.02 | 40.54 |
|                                                                  | TIM3+GrB+                          | 0.3354  | 0.0556  | 0    | 4.91  |
|                                                                  | PD-L1+CD3-                         | 1.848   | 0.7587  | 0.01 | 18.87 |
|                                                                  | PD-L1+CD3-CD4+                     | 0.9362  | 0.371   | 0    | 9.85  |
|                                                                  | PD-L1+CD68-                        | 1.9138  | 0.7528  | 0.01 | 21.64 |
|                                                                  | PD-L1+CD20-                        | 1.2581  | 0.4007  | 0.01 | 16.51 |
|                                                                  | PD-1+CD3-                          | 3.0841  | 1.8092  | 0.17 | 23.5  |
|                                                                  | PD-1+CD3-CD4+                      | 1.0302  | 0.7565  | 0.04 | 4.47  |
|                                                                  | PD-1+CD68-                         | 7.1719  | 5.565   | 0.42 | 28.48 |
|                                                                  | PD-L1+PD-1+CD3-                    | 0.5065  | 0.2879  | 0    | 5.89  |
|                                                                  | PD-L1+PD-1+CD3-CD4+                | 0.2553  | 0.1242  | 0    | 3.32  |
|                                                                  | PD-L1+PD-1+CD68-                   | 0.9917  | 0.5837  | 0    | 5.96  |
| Proportion T cells expressing immune checkpoint molecules        | PD-1+CD3+/CD3+                     | 25.7243 | 24.8914 | 1.51 | 62.82 |
|                                                                  | TIM3+CD3+/CD3+                     | 26.3649 | 20.9115 | 0.21 | 97.22 |
|                                                                  | PD-L1+CD3+/CD3+                    | 6.3508  | 4.222   | 0.08 | 37.33 |
|                                                                  | PD-L1+PD-1+CD3+/CD3+               | 3.8775  | 2.6883  | 0.02 | 32.07 |
|                                                                  | PD-1+CD4+CD3+/CD4+CD3+             | 29.0796 | 27.4973 | 1.23 | 61.47 |
|                                                                  | PD-L1+CD4+CD3+/CD4+CD3+            | 8.6076  | 5.3314  | 0.09 | 54.79 |
|                                                                  | PD-L1+PD-1+CD4+CD3+/CD4+CD3+       | 5.3417  | 3.4567  | 0.03 | 47.61 |
|                                                                  | PD-1+CD4-CD3+/CD4-CD3+             | 19.1875 | 16.7218 | 0.84 | 64.19 |
|                                                                  | PD-L1+CD4-CD3+/CD4-CD3+            | 3.1507  | 1.4152  | 0.02 | 25.22 |
|                                                                  | PD-L1+PD-1+CD4-CD3+/CD4-CD3+       | 1.6647  | 0.9469  | 0.02 | 12.56 |
| Proportion of macrophages expressing immune checkpoint molecules | PD-L1+CD68+/CD68+                  | 9.1753  | 5.9764  | 0.09 | 42.8  |
|                                                                  | TIM3+CD68+/CD68+                   | 19.5377 | 14.584  | 0.09 | 67.96 |
|                                                                  | PD-1+CD68+/CD68+                   | 9.271   | 7.5281  | 0.35 | 41.93 |
|                                                                  | PD-L1+TIM3+CD68+/CD68+             | 4.7154  | 2.43    | 0    | 27.33 |
|                                                                  | PD-L1+PD-1+CD68+/CD68+             | 2.7695  | 1.7685  | 0.01 | 19.45 |
|                                                                  | PD-L1+CD163+CD68+/CD163+CD68+      | 11.5686 | 7.6547  | 0    | 52.01 |
|                                                                  | TIM3+CD163+CD68+/CD163+CD68+       | 25.1285 | 21.0324 | 0    | 77.81 |
|                                                                  | PD-1+CD163+CD68+/CD163+CD68+       | 9.5549  | 8.1337  | 0    | 46.42 |
|                                                                  | PD-L1+TIM3+CD163+CD68+/CD163+CD68+ | 5.873   | 3.1107  | 0    | 33.56 |
|                                                                  | PD-L1+PD-1+CD163+CD68+/CD163+CD68+ | 3.3834  | 2.2892  | 0    | 25.05 |
|                                                                  | PD-L1+CD163-CD68+/CD163-CD68+      | 7.3976  | 5.2716  | 0.03 | 37.88 |
|                                                                  | TIM3+CD163-CD68+/CD163-CD68+       | 16.3864 | 11.7623 | 0.1  | 59.83 |
|                                                                  | PD-1+CD163-CD68+/CD163-CD68+       | 9.2283  | 7.4636  | 0.6  | 37.6  |
|                                                                  | PD-L1+TIM3+CD163-CD68+/CD163-CD68+ | 3.8634  | 2.0822  | 0    | 22.86 |
|                                                                  | PD-L1+PD-1+CD163-CD68+/CD163-CD68+ | 2.2864  | 1.5441  | 0    | 12.22 |
| Proportion of NK cells expressing immune checkpoint molecules    | TIM3+CD56+CD3-/CD56+CD3-           | 27.8687 | 20      | 0    | 100   |
|                                                                  | TIM3+CD56+CD3-CD45+/CD56+CD3-CD45+ | 29.3928 | 20.4133 | 0    | 100   |
| Proportion of B cells expressing immune checkpoint molecules     | PD-L1+CD20+/CD20+                  | 3.1077  | 1.1314  | 0    | 37.47 |
|                                                                  | TIM3+CD20+/CD20+                   | 9.5093  | 5.4205  | 0.02 | 52.19 |
|                                                                  | PD-L1+TIM3+CD20+/CD20+             | 1.3046  | 0.4396  | 0    | 21.44 |

**Supplementary Table S4: Patient demographics for the groups with a lymphocyte high/macrophage low and a lymphocyte high/macrophage high or a lymphocyte low LME in the mIHC and Reddy et al. cohorts**

| Characteristics   | mIHC cohort                        |             | <i>P</i> | Reddy et al. cohort                |             | <i>P</i> |
|-------------------|------------------------------------|-------------|----------|------------------------------------|-------------|----------|
|                   | T cell high / Macrophage low n (%) | Other n (%) |          | T cell high / Macrophage low n (%) | Other n (%) |          |
| No of patients    | 28 (100)                           | 143 (100)   |          | 185 (100)                          | 311 (100)   |          |
| Age               |                                    |             | 0.409    |                                    |             | 0.055    |
| <60               | 16 (57)                            | 67 (47)     |          | 86 (49)                            | 119 (40)    |          |
| ≥60               | 12 (43)                            | 76 (53)     |          | 89 (51)                            | 179 (60)    |          |
| nd                |                                    |             |          | 10                                 | 13          |          |
| Gender            |                                    |             | 1.000    |                                    |             | 0.710    |
| Male              | 16 (57)                            | 83 (58)     |          | 103 (56)                           | 167 (54)    |          |
| Female            | 12 (43)                            | 60 (42)     |          | 82 (44)                            | 144 (46)    |          |
| Molecular subtype |                                    |             | 0.023    |                                    |             | 0.781    |
| GCB <sup>a</sup>  | 14 (70)                            | 47 (41)     |          | 84 (45)                            | 133 (43)    |          |
| ABC               | 3 (15)                             | 51 (44)     |          | 72 (39)                            | 131 (42)    |          |
| Unclassified      | 3 (15)                             | 17 (15)     |          | 29 (16)                            | 47 (15)     |          |
| nd                | 8                                  | 28          |          |                                    |             |          |
| WHO PS            |                                    |             | 0.251    |                                    |             | 0.177    |
| 0-1               | 23 (82)                            | 98 (70)     |          | 135 (79)                           | 214 (74)    |          |
| ≥2                | 5 (18)                             | 42 (58)     |          | 35 (21)                            | 77 (26)     |          |
| nd                |                                    | 1           |          | 15                                 | 20          |          |
| Stage             |                                    |             | 0.037    |                                    |             | 0.005    |
| I-II              | 18 (64)                            | 59 (42)     |          | 81 (45)                            | 98 (32)     |          |
| III-IV            | 10 (36)                            | 83 (58)     |          | 99 (55)                            | 208 (68)    |          |
| nd                |                                    | 1           |          | 5                                  | 5           |          |
| IPI               |                                    |             | <0.001   |                                    |             | <0.001   |
| 0-2               | 23 (82)                            | 66 (47)     |          | 99 (69)                            | 113 (46)    |          |
| 3-5               | 5 (18)                             | 74 (53)     |          | 45 (31)                            | 131 (54)    |          |
| nd                |                                    | 3           |          | 41                                 | 67          |          |
| Elevated LDH      |                                    |             | 0.017    |                                    |             | 0.001    |
| Yes               | 12 (43)                            | 95 (68)     |          | 95 (57)                            | 111 (41)    |          |
| No                | 16 (57)                            | 45 (32)     |          | 72 (43)                            | 167 (59)    |          |
| nd                |                                    | 3           |          | 18                                 | 37          |          |
| EN                |                                    |             | 0.348    |                                    |             | 0.348    |
| 0-1               | 23 (82)                            | 96 (72)     |          | 132 (77)                           | 209 (72)    |          |
| ≥2                | 5 (18)                             | 38 (28)     |          | 40 (23)                            | 83 (28)     |          |
| nd                |                                    | 9           |          | 13                                 | 19          |          |
| B-symptoms        |                                    |             | 0.137    |                                    |             |          |
| Yes               | 7 (25)                             | 57 (41)     |          |                                    |             |          |
| No                | 21 (75)                            | 81 (59)     |          |                                    |             |          |
| nd                |                                    | 5           |          |                                    |             |          |
| Double expressor  |                                    |             | 0.233    |                                    |             |          |
| Yes               | 5 (22)                             | 43 (36)     |          |                                    |             |          |
| No                | 18 (78)                            | 77 (64)     |          |                                    |             |          |
| nd                | 5                                  | 23          |          |                                    |             |          |
| Double hit        |                                    |             | 1.000    |                                    |             |          |
| Yes               | 1 (4)                              | 7 (6)       |          |                                    |             |          |
| No                | 23 (96)                            | 112 (94)    |          |                                    |             |          |
| nd                | 4                                  | 24          |          |                                    |             |          |
| Treatment         |                                    |             | 0.044    |                                    |             |          |
| R-CHOP            | 23 (82)                            | 91 (64)     |          |                                    |             |          |
| R-CHOEP           | 4 (14)                             | 50 (35)     |          |                                    |             |          |

|                          |        |        |        |        |
|--------------------------|--------|--------|--------|--------|
| R-CHOP like <sup>b</sup> | 1 (4)  | 2 (1)  |        |        |
| 5-year PFS               | 92.6 % | 69.8 % |        |        |
| 5-year OS                | 92.3 % | 74.4 % | 69.7 % | 58.3 % |

---

<sup>a</sup>GCB, germinal center B-cell like; ABC, activated B-cell like; nd, not determined; IPI, international prognostic index; LDH, lactate dehydrogenase; EN, extranodal site; R-CHOP, rituximab, cyclophosphamide, doxorubicine, vincristine, prednisone; R-CHOEP, R-CHOP+etoposide; <sup>b</sup>R-CHOP like, one R-CHOP/R-CHEP, one R-CHOP/R-CNOP, one R-CHOP/R-mini-CHOP

**Supplementary Table S5: Proportions of immune cell subtypes inferred by CIBERSORT in the Reddy et al. cohort**

| Cell subtype                 | Mean (%) | Median (%) | Min (%) | Max (%) |
|------------------------------|----------|------------|---------|---------|
| T cells                      | 23.22    | 21.60      | 4.96    | 65.06   |
| CD8 T cells                  | 6.90     | 5.75       | 0.00    | 36.51   |
| CD4 T cells                  | 15.80    | 14.31      | 2.84    | 50.26   |
| Naive CD4 T cells            | 0.61     | 0.00       | 0.00    | 13.87   |
| Resting memory CD4 T cells   | 5.87     | 4.52       | 0.00    | 34.79   |
| Activated memory CD4 T cells | 2.97     | 1.88       | 0.00    | 18.74   |
| Follicular helper T cells    | 5.28     | 4.47       | 0.00    | 27.27   |
| Regulatory T cells           | 1.07     | 0.00       | 0.00    | 11.28   |
| Gamma delta T cells          | 0.53     | 0.00       | 0.00    | 10.26   |
| Macrophages                  | 18.49    | 17.15      | 3.08    | 49.41   |
| M0 macrophages               | 6.85     | 5.95       | 0.00    | 26.07   |
| M1 macrophages               | 4.39     | 3.76       | 0.00    | 19.10   |
| M2 macrophages               | 7.25     | 6.51       | 0.00    | 29.90   |
| Monocytes                    | 0.56     | 0.00       | 0.00    | 10.72   |
| NK cells                     | 3.24     | 2.78       | 0.00    | 13.66   |
| Resting NK cells             | 1.57     | 0.34       | 0.00    | 12.84   |
| Activated NK cells           | 1.67     | 1.03       | 0.00    | 13.66   |
| Naive B cells                | 11.01    | 7.83       | 0.00    | 65.95   |
| Memory B cells               | 31.13    | 29.39      | 0.00    | 73.01   |
| Plasma cells                 | 2.64     | 0.30       | 0.00    | 29.37   |
| Dendritic cells              | 1.08     | 0.25       | 0.00    | 10.37   |
| Resting dendritic cells      | 0.37     | 0.00       | 0.00    | 8.47    |
| Activated dendritic cells    | 0.71     | 0.00       | 0.00    | 10.37   |
| Mast cells                   | 7.62     | 7.39       | 0.00    | 25.07   |
| Resting mast cells           | 7.22     | 6.99       | 0.00    | 25.07   |
| Activated mast cells         | 0.40     | 0.00       | 0.00    | 15.02   |
| Eosinophils                  | 0.63     | 0.00       | 0.00    | 8.63    |
| Neutrophils                  | 0.37     | 0.00       | 0.00    | 7.41    |

**Supplementary Table S6: Differential pathways enriched in the T cell high group in the mIHC group.** Please see separate Excel file.

**Supplementary Table S7: Differential pathways enriched in the T cell high group in the Reddy et al. cohort.** Please see separate Excel file.

**Supplementary Table S8: Differential pathways enriched in the T cell high/macrophage low group in the Reddy et al. cohort.** Please see separate Excel file.

**Supplementary Table S9: Differential pathways enriched in the T cell high/Macrophage low group compared to T cell high/Macrophage high group in the Reddy et al. cohort.** Please see separate Excel file.

**Supplementary Table S10: Differently expressed genes in the T cell high/macrophage low group in the Reddy et al. cohort.** Please see separate Excel file.



**Supplementary Table S11: Patient demographics for the Chapuy et al. cohort**

| Characteristics   | Chapuy et al. cohort n (%) |
|-------------------|----------------------------|
| No of patients    | 137 (100)                  |
| Age               |                            |
| median (range)    | 67 (26-93)                 |
| <60               | 44 (34)                    |
| ≥60               | 86 (66)                    |
| nd                | 7                          |
| Gender            |                            |
| Male              | 76 (55)                    |
| Female            | 61 (45)                    |
| Molecular subtype |                            |
| GCB <sup>a</sup>  |                            |
| ABC               |                            |
| Unclassified      |                            |
| nd                | 137                        |
| WHO PS            |                            |
| 0-1               | 87 (81)                    |
| ≥2                | 21 (19)                    |
| nd                | 29                         |
| Stage             |                            |
| I-II              | 39 (36)                    |
| III-IV            | 69 (64)                    |
| nd                | 29                         |
| IPI               |                            |
| 0-2               | 60 (58)                    |
| 3-5               | 44 (42)                    |
| nd                | 33                         |
| Elevated LDH      |                            |
| Yes               | 52 (50)                    |
| No                | 52 (50)                    |
| nd                | 33                         |
| EN                |                            |
| 0-1               | 80 (74)                    |
| ≥2                | 28 (26)                    |
| nd                | 29                         |
| Treatment         |                            |
| R-CHOP like       | 101 (78)                   |
| other             | 29 (22)                    |
| nd                | 7                          |
| 5-year PFS        | 64.3 %                     |
| 5-year OS         | 70.6 %                     |

<sup>a</sup>GCB, germinal center B-cell like; ABC, activated B-cell like; nd, not determined; IPI, international prognostic index; LDH, lactate dehydrogenase; EN, extranodal site; R-CHOP, rituximab, cyclophosphamide, doxorubicine, vincristine, prednisone
